# Supplementary material
Source: PubMed Central journal article supplement (PMC2834868)
Supplement: NIHMS167826-supplement-1.pdf [file NIHMS167826-supplement-1.pdf]

**Mosaic HIV-1 Vaccines Expand the Breadth and Depth of Cellular Immune Responses in Rhesus  
Monkeys**

Dan H. Barouch<sup>1,2</sup>, Kara L. O'Brien<sup>1</sup>, Nathaniel L. Simmons<sup>1</sup>, Sharon L. King<sup>1</sup>, Peter Abbink<sup>1</sup>, Lori F. Maxfield<sup>1</sup>, Ying-Hua Sun<sup>1</sup>, Annalena La Porte<sup>1</sup>, Ambryce M. Riggs<sup>1</sup>, Diana M. Lynch<sup>1</sup>, Sarah L. Clark<sup>1</sup>, Katherine Backus<sup>1</sup>, James R. Perry<sup>1</sup>, Michael S. Seaman<sup>1</sup>, Angela Carville<sup>3</sup>, Keith G. Mansfield<sup>3</sup>, James J. Szinger<sup>4</sup>, Will Fischer<sup>4</sup>, Mark Muldoon<sup>5,6</sup>, Bette Korber<sup>4,6</sup>

<sup>1</sup>Division of Vaccine Research, Beth Israel Deaconess Medical Center, Boston, MA; <sup>2</sup>Ragon Institute of MGH, MIT, and Harvard, Boston, MA; <sup>3</sup>New England Primate Research Center, Southborough, MA; <sup>4</sup>Los Alamos National Laboratory, Los Alamos, NM; <sup>5</sup>School of Mathematics, University of Manchester, Manchester, UK; <sup>6</sup>Santa Fe Institute, Santa Fe, NM

Correspondence should be addressed to D.H.B. (dbarouch@bidmc.harvard.edu)

## SUPPLEMENTARY FIGURES

**Supplementary Figure 1.** CD8<sup>+</sup> T lymphocyte responses to PTE peptides at week 4 following immunization mapped onto HIV-1 Gag, Pol, and Env protein sequences. Colors denote monkeys that received the mosaic (blue), M consensus (green), clade B + clade C (purple), or optimal natural clade C (red) HIV-1 Gag, Pol, and Env antigens. For each epitope, the monkey number, antigen (G, Gag; P, Pol; E, Env), subpool number, and individual PTE peptide number are indicated.

**Supplementary Figure 2.** CD4<sup>+</sup> T lymphocyte responses to PTE peptides at week 4 following immunization mapped onto HIV-1 Gag, Pol, and Env protein sequences. Colors denote monkeys that received the mosaic (blue), M consensus (green), clade B + clade C (purple), or optimal natural clade C (red) HIV-1 Gag, Pol, and Env antigens. For each epitope, the monkey number, antigen (G, Gag; P, Pol; E, Env), subpool number, and individual PTE peptide number are indicated.

**Supplementary Figure 3.** Alignment of vaccine sequences with reactive PTE peptides in all monkeys at week 4 following immunization with rAd26 vectors expressing mosaic, M consensus, clade B + clade C, or optimal natural clade C HIV-1 Gag, Pol, and Env antigens. For each monkey, vaccine sequences are shown on the top, and reactive PTE peptides are shown beneath the vaccine sequences denoted by the antigen (G, Gag; P, Pol; E, Env) and PTE peptide numbers. The minimal overlap region is shown in bold. Sequence polymorphisms between the two mosaic or the two clade B + clade C antigens are shown in blue. Differences between the vaccine sequences and the reactive PTE peptides are shown in red.

**Supplementary Figure 4.** Theoretical coverage of PTE peptides by the various vaccine antigens. Percentage of 9 amino acid PTE peptides that are covered by the mosaic (blue), M consensus (green), clade B + clade C (purple), or optimal natural clade C (red) HIV-1 Gag, Pol, and Env antigens are shown.

# CD8 Gag

Natural C  
 M Consensus  
 B+C  
 Mosaic

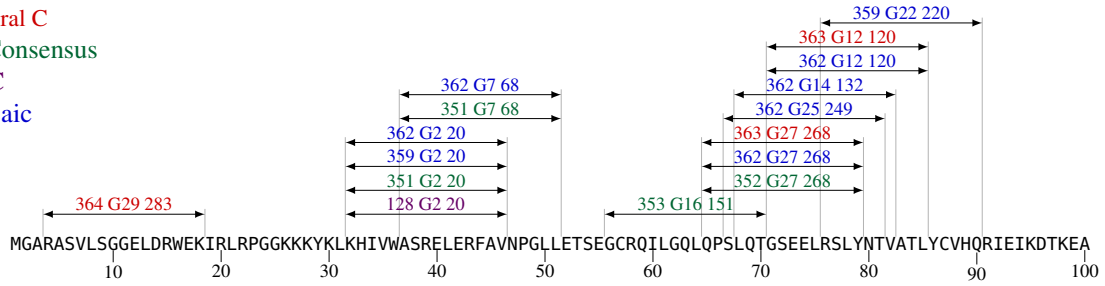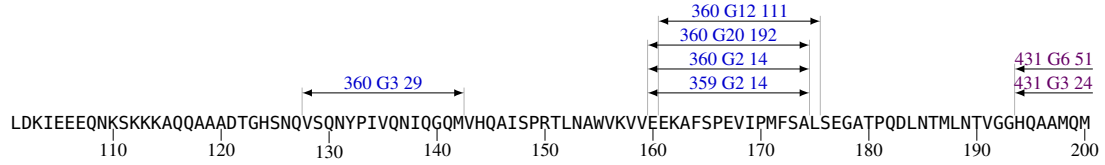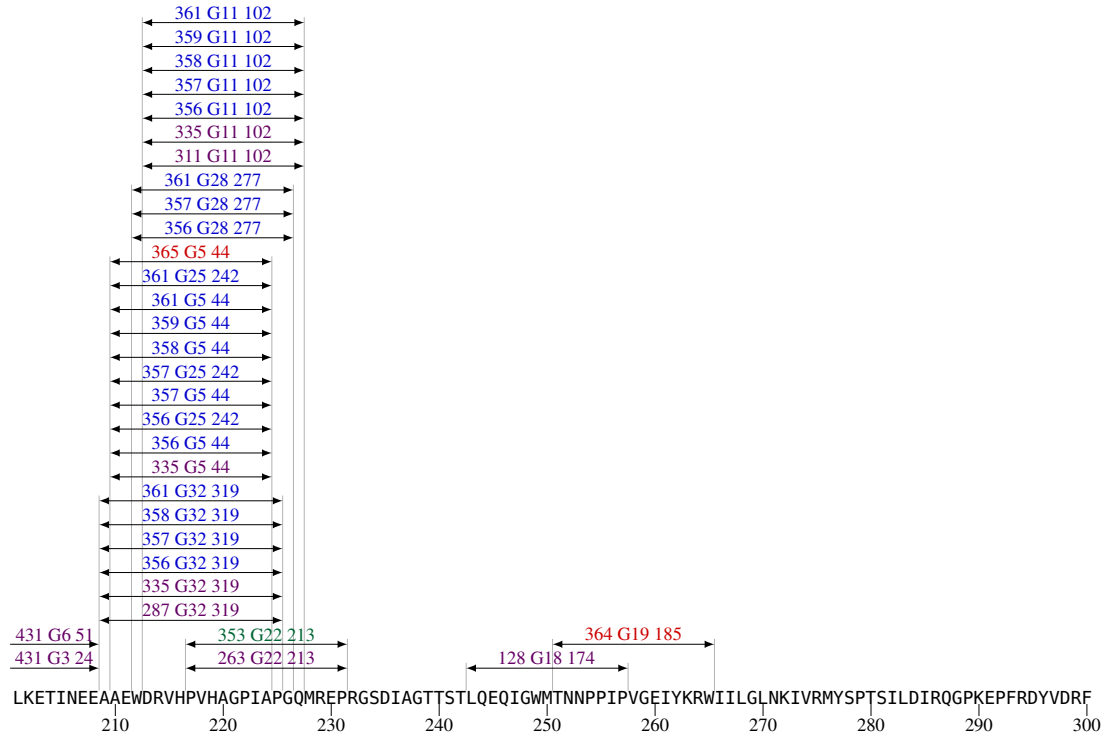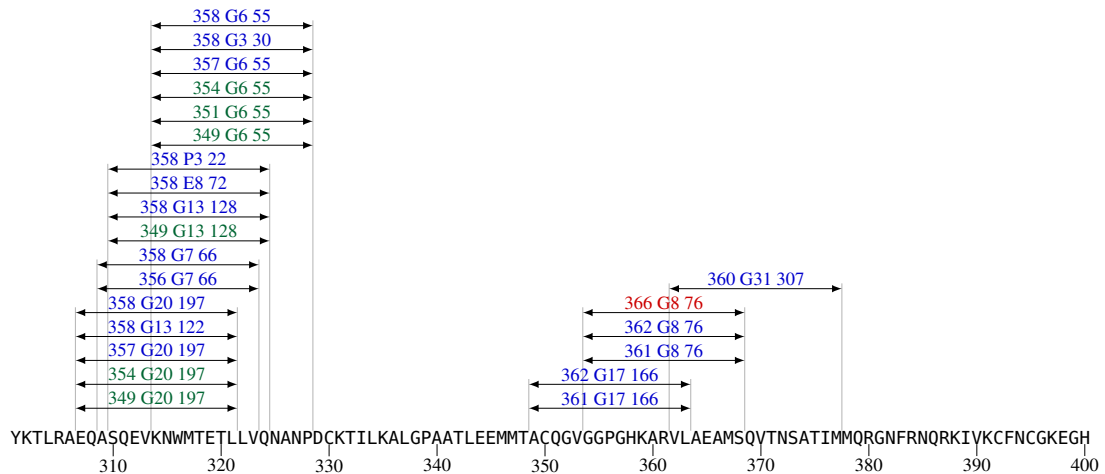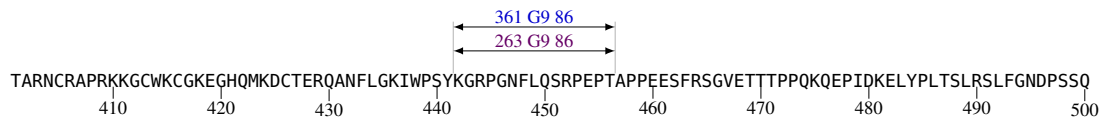

# CD8 Pol

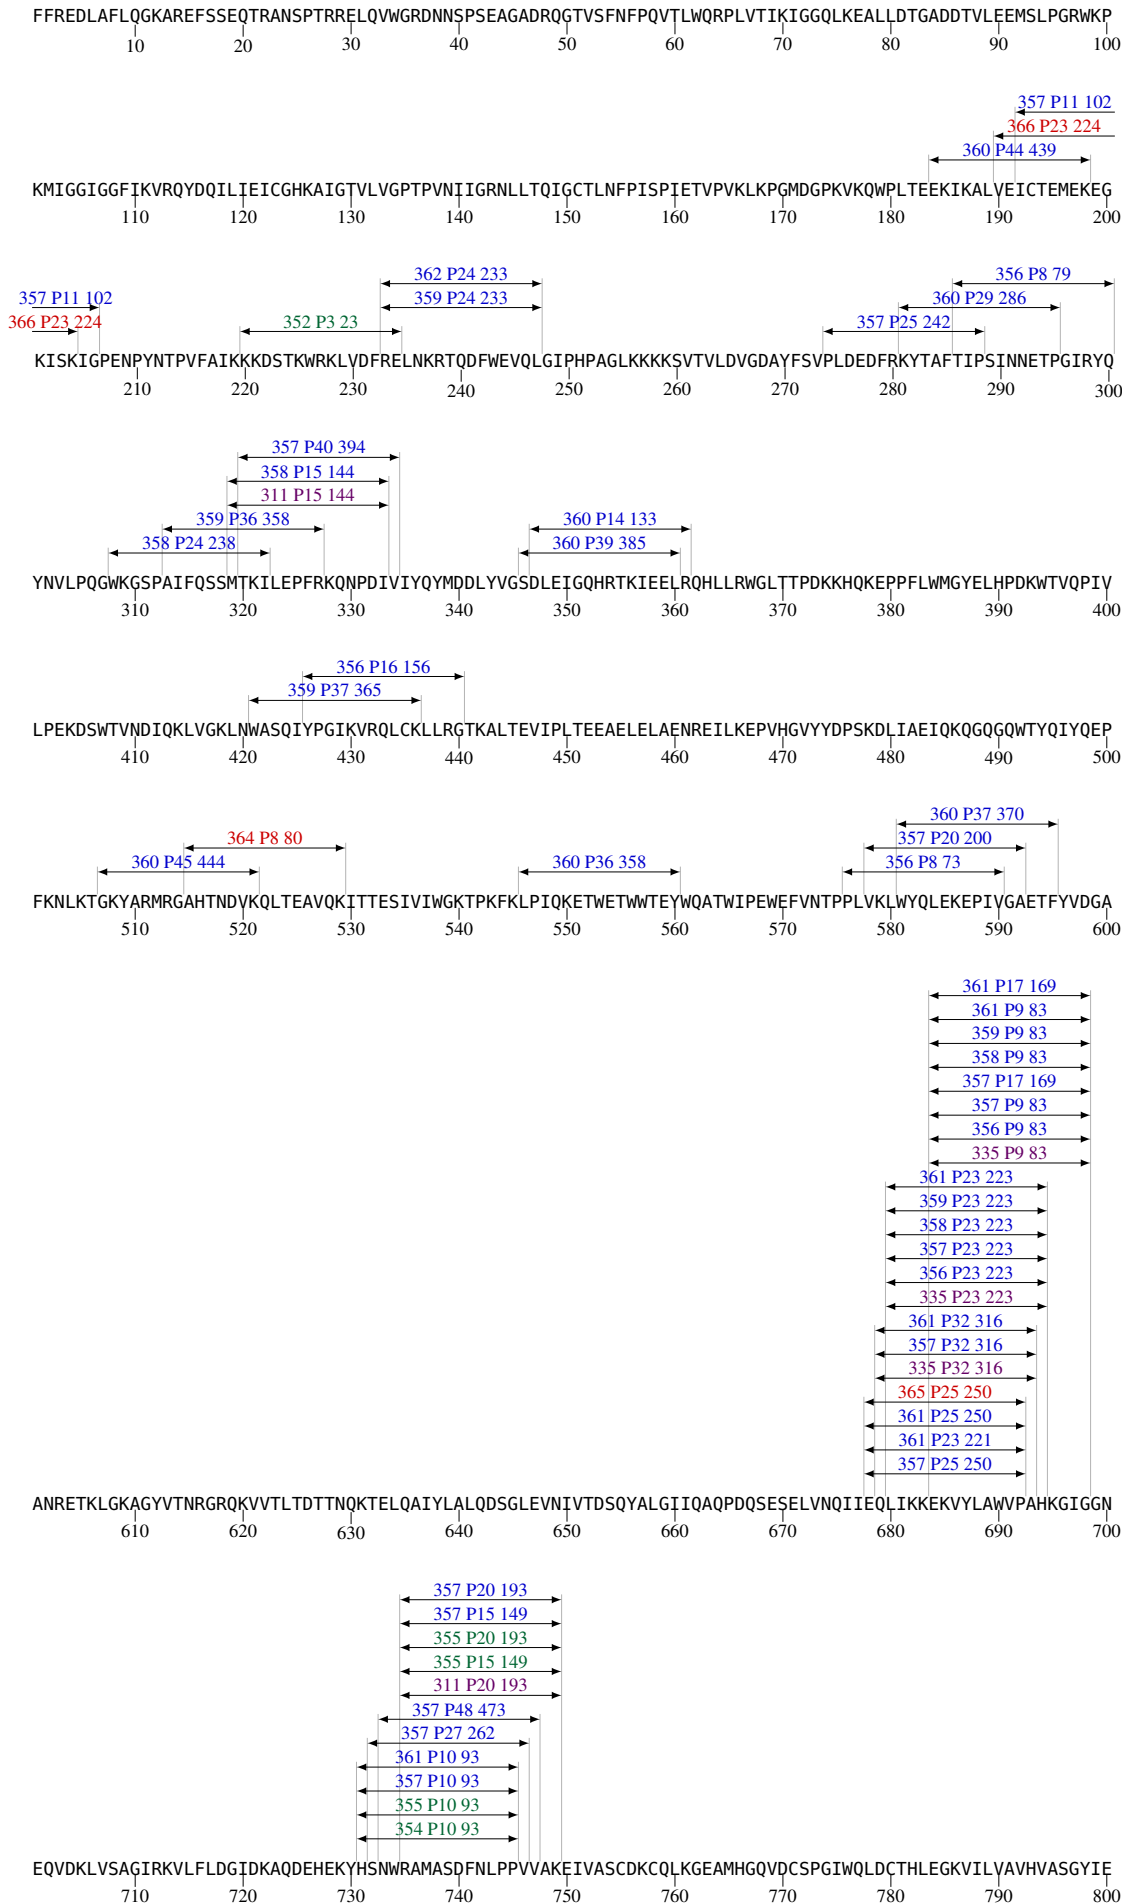

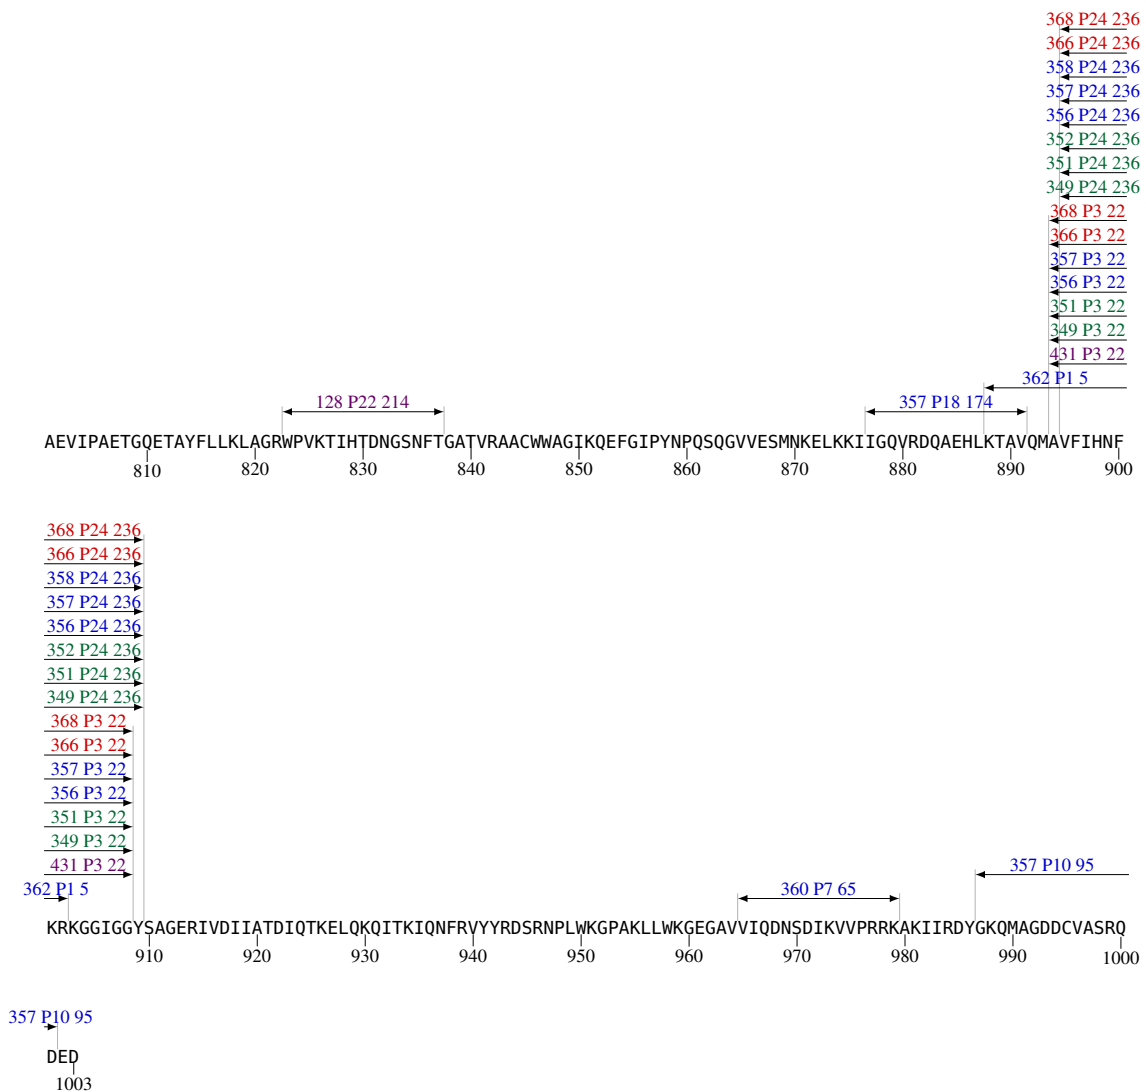

## CD8 Env

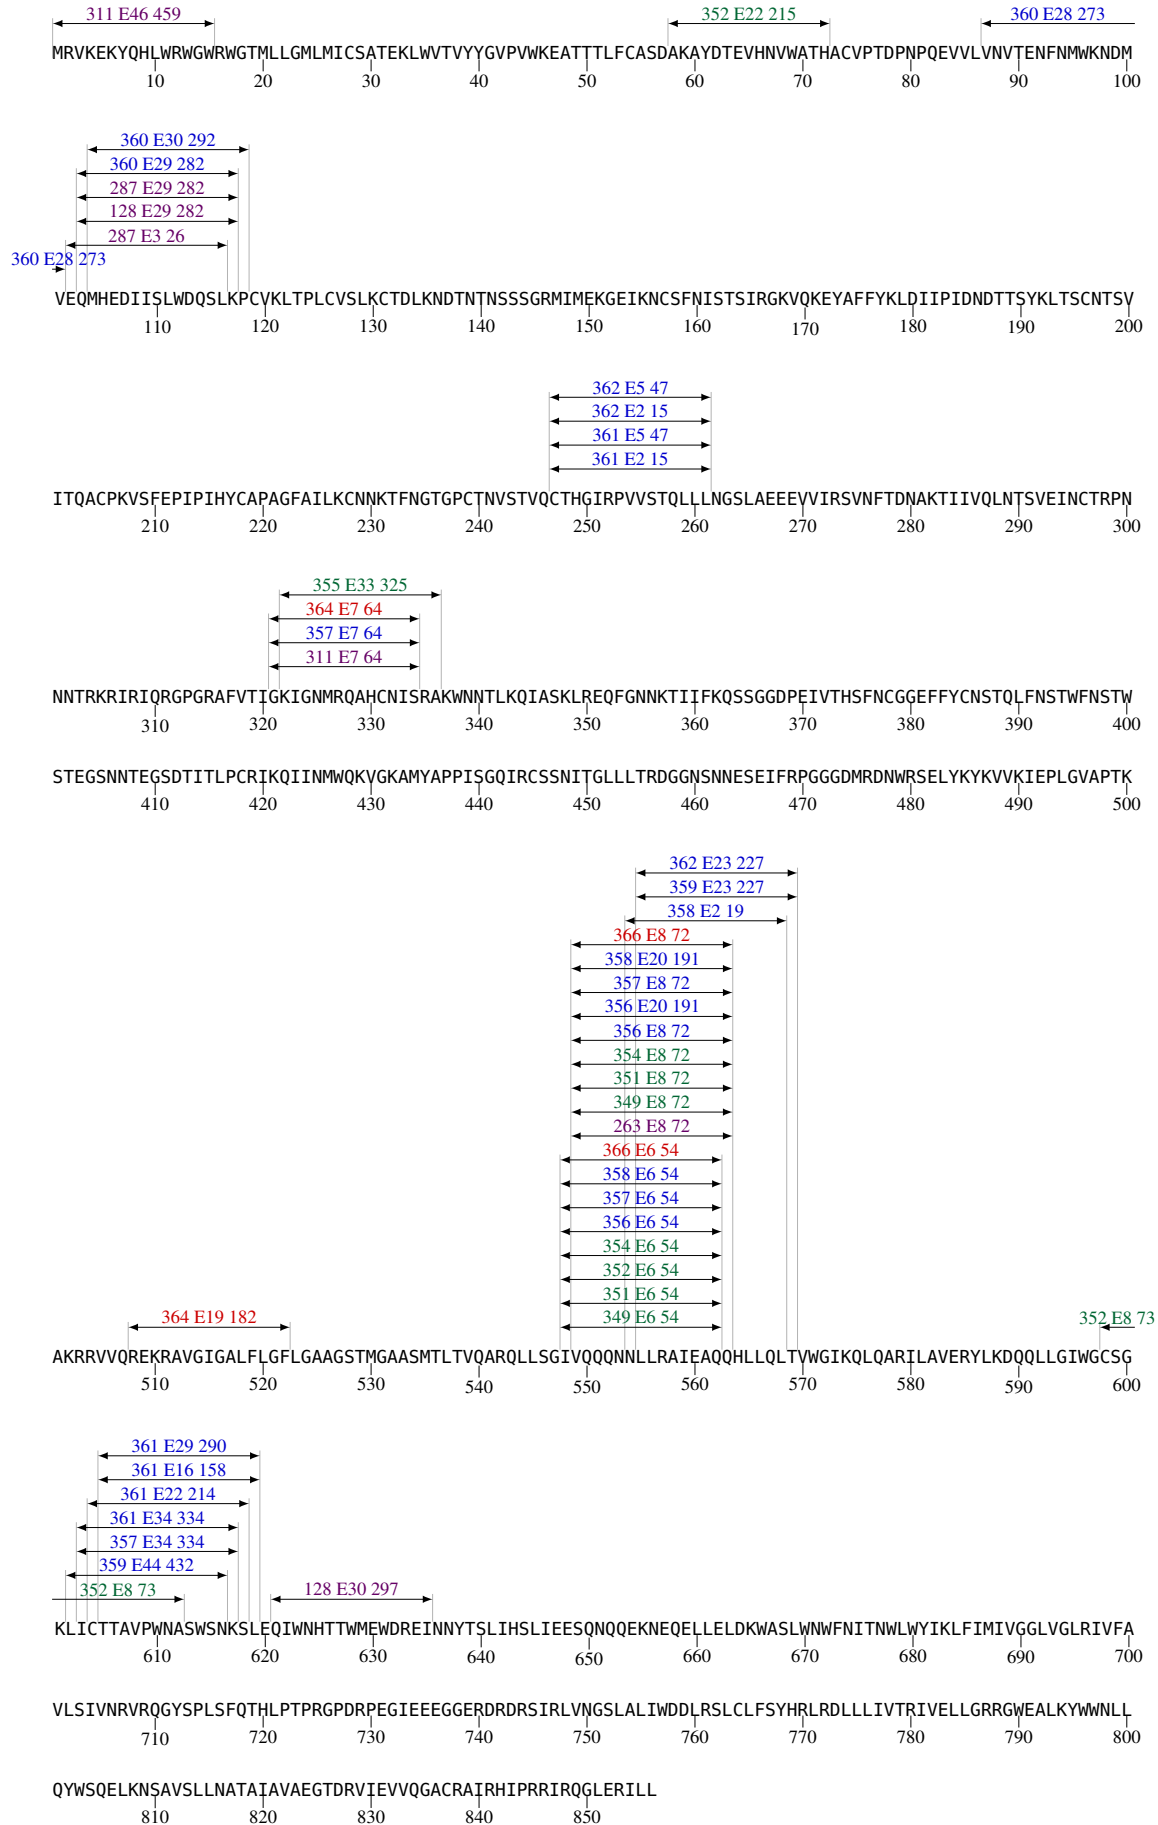

# CD4 Gag

Natural C  
 M Consensus  
 B+C  
 Mosaic

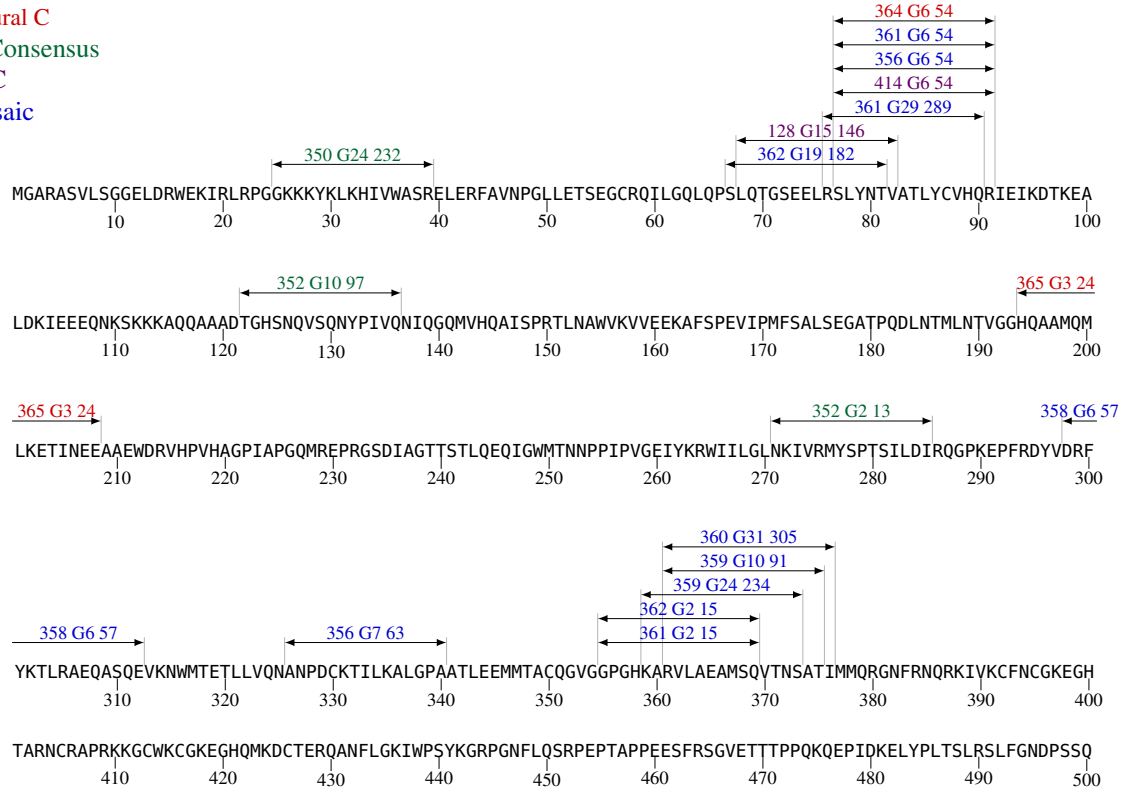

## CD4 Pol

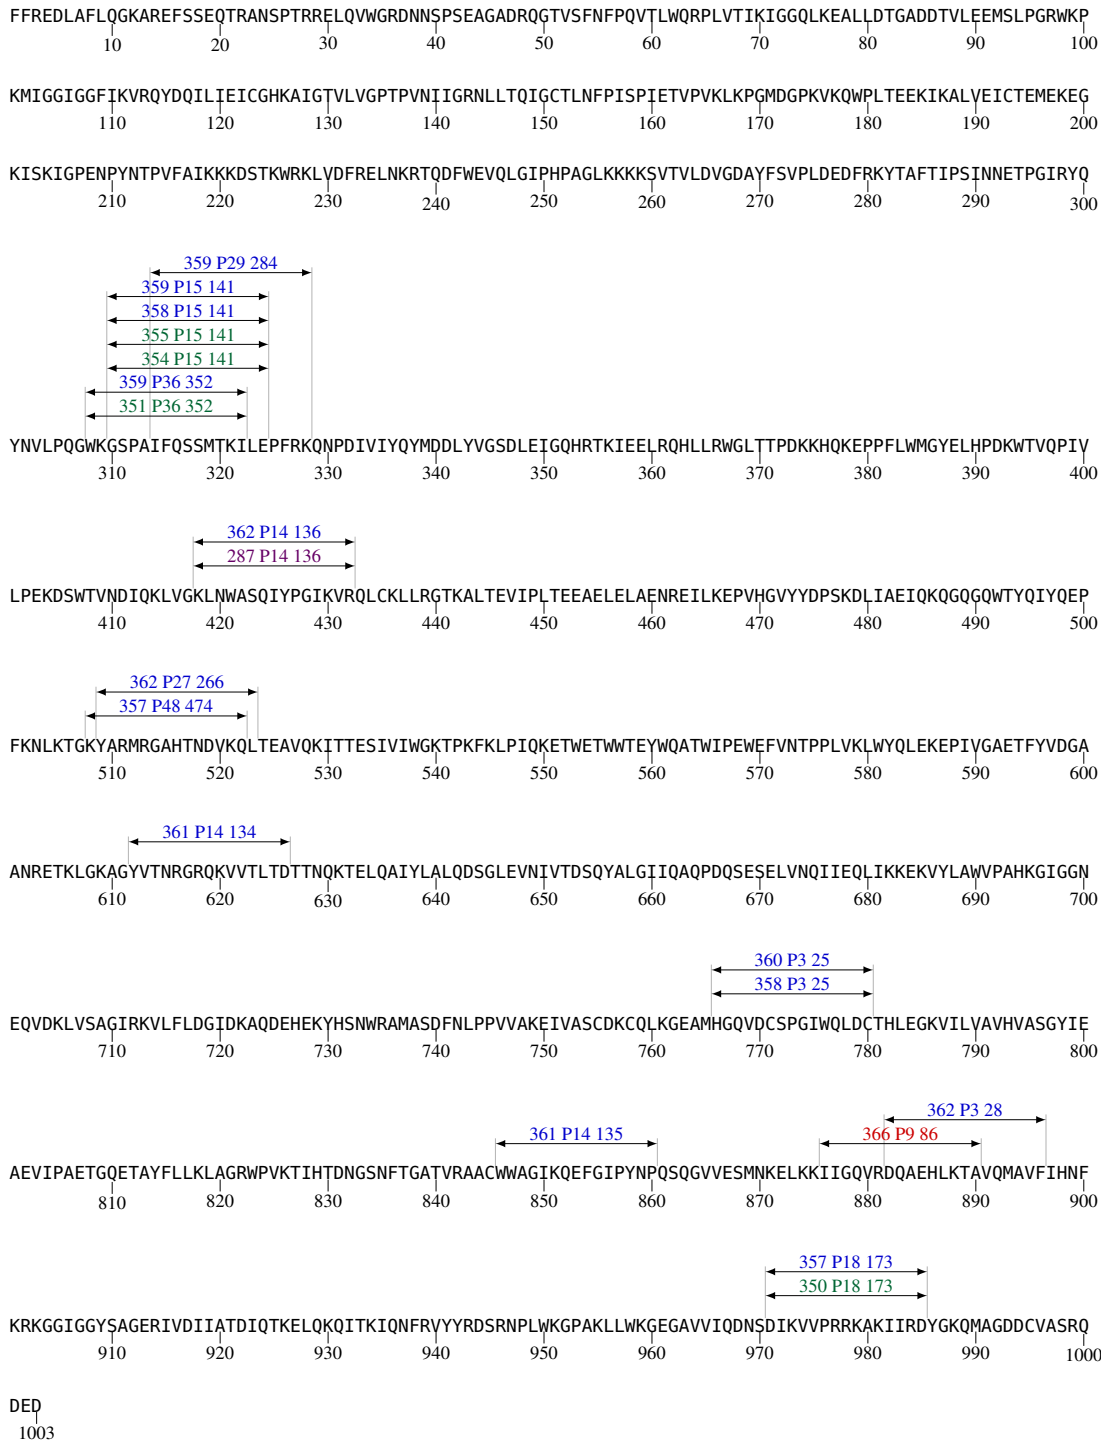



## CD4 Env

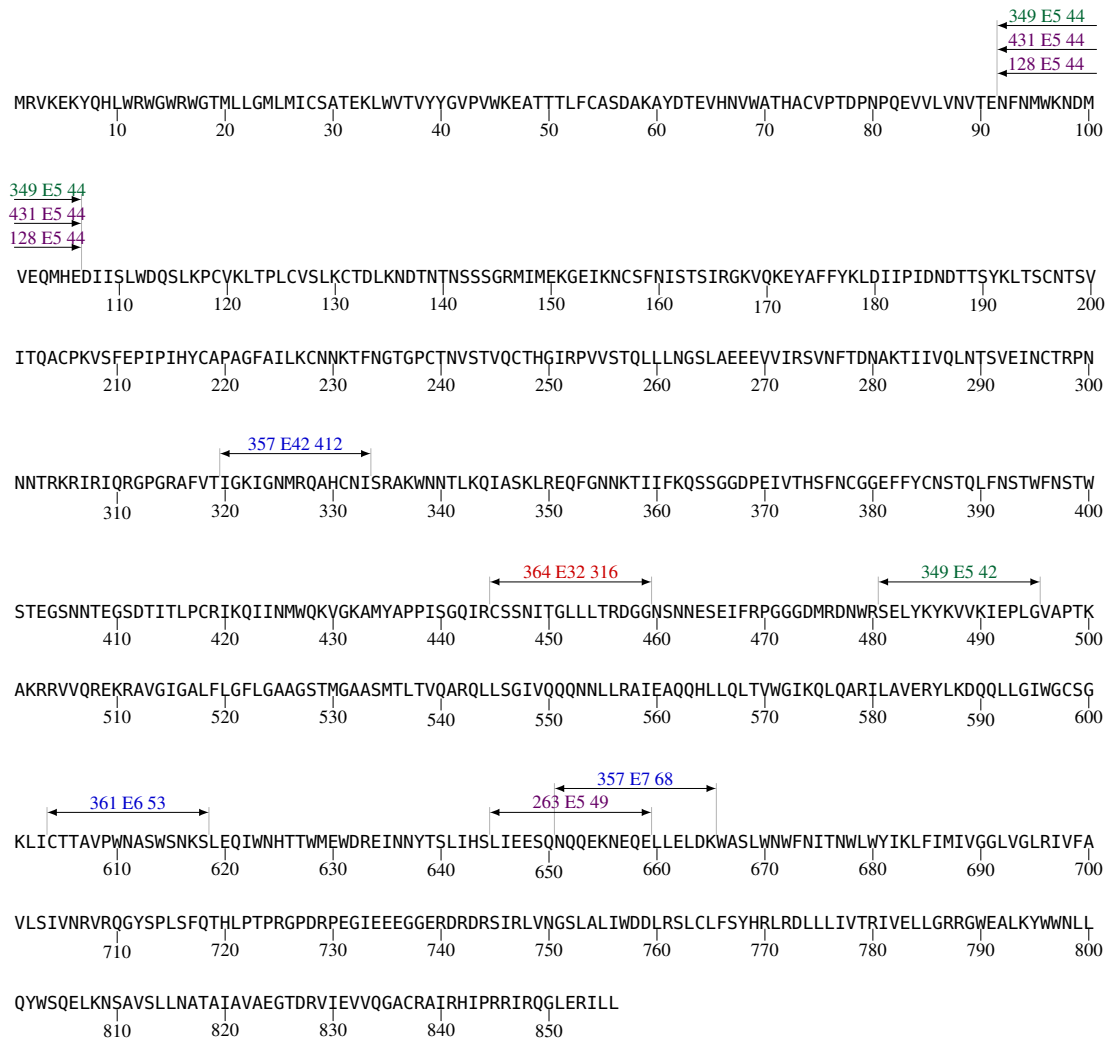

### Supplementary Figure 3. Alignments of vaccine sequences with reactive PTE peptides

Minimal regions within the peptides that are likely to contain the immune response epitope, based on overlap between reactive peptides when it occurs, are in bold in the vaccines. If there is no overlapping peptide, we assume the epitope can be anywhere in the peptide, so the whole region is bold. We cannot differentiate between different T cell responses targeting epitopes with different boundaries within a peptide, or more promiscuous clonal T cell responses that can tolerate variation when variants are present; either scenario could be advantageous in a vaccine immune response. The number of targeted regions corresponds to the minimum number of T cell responses required to account for the data.

Amino acids where the vaccine and the peptides don't match are written in red; if they fall within the region likely to carry the epitope, they are bold red. Amino acid differences outside of the overlapping regions when multiple peptides overlap are marked in red, but not bold.

The vaccines are always at the top. The letter for each protein (Gag is G, Pol is P, Envelope is E) and the peptide number are used to label for each reactive PTE peptide. The protein and HXB2 numbers follow each peptide.

For the mosaic and clade B+C vaccines, there are 2 antigens each and both are included in the alignment; amino acid differences in the vaccines are noted in blue, and if the reactive peptide carries the variant amino acid in the second mosaic, it is also in blue. In each of the positions where the two vaccine antigens differ, the reactive peptides are also marked in bold to indicate the positions where including two variants may have impacted the vaccine immune response and allowed greater breadth and depth.

For example, the first vaccine summarized is the clade B+C vaccine, and animal 287-95 is the first animal for which responses are listed. There were 3 CD8 responses to PTE peptides, 1 to CD4. Two of the CD8 peptides show substantial overlap, E26 and E282, so both may be targets for the same CTL response; thus we also note there are only 2 CD8 responsive regions, and 1 CD4 responsive regions. For each responsive region, we write out the number of overlapping peptides per region (e.g. CD8: 1 **2** CD4: 1) to assess depth of responses; the two is red to indicate that the region of overlap is variable in the reactive peptides. If the vaccine differs, like the D/E in the second reactive region, it is marked in blue. Only the region of overlap is bold. The H in E282 was not found in either vaccine so it is marked with red; it is within the region of overlap so it is bold. Each reactive peptide has its protein and corresponding HXB2 numbering noted on the right.

---

#### Reactive peptides and breadth and depth of responses: Clade B+C Vaccine

##### Clade B+C 287-95:

3 CD8 PTE+, 1 CD4 PTE+

2 CD8+ regions, 1 CD4+ region

Number of overlapping peptides per region: CD8: 1 **2** CD4: 1

##### 3 CD8 responses:

C **AAEWDR**LHPVHAGPIA

B **AAEWDR**LHPVHAGPIA

G319 AAE-DRLHPVHAGPI**P** Gag 209 225

C **DQMHEDIISLWDQSLK**

B **EQMHEDIISLWDQSLK**

E26 **EQMHEDIISLWDQSL** Env 102 116

E282 **H**MHEDIISLWDE**SLK** Env 103 117

### 1 CD4 response:

C KLNWASQIYSGIKVR  
B KLNWASQIYPGIKVR  
P136 KLNWASQIYAGIKVK Pol 418 432

---

### Clade B+C 128-92:

5 CD8 PTE+, 2 CD4 PTE+

5 CD8+ regions, 2 CD4+ regions

Number of overlapping peptides per region: CD8: 1 1 1 1 1 CD4: 1 1

### 5 CD8 responses:

C KHLVWASRELERFAL  
B KHIVWASRELERFAV  
G20 KHLVWASRELERFAL Gag 32 46

C LQEQIAWMTNNPPVP  
B LQEQIGWMTNNPPIP  
G174 LAEQIAWMTSNPPIP Gag 243 257

C QMHEDIISLWDQSLK  
B QMHEDIISLWDQSLK  
E282 HMHEDIISLWDESLK Env 103 117

C DIWDNMTWMQWDREI  
B EIWDNMTWMEWEREI  
E297 EIWNMTWMEWEKEI Env 621 635

C WPVKVIHTANGSNFT  
B WPVKTIHTANGSNFT  
P214 WPVKVVTHTDNGSNFT Pol 823 837

### 2 CD4 responses:

C AQTGTEELRSLYNTV  
B LQTGSEELRSLYNTV  
G146 LQTGSEELKSLFNTV Gag 68 82

C YFNMWKNDMVDQMHE  
B NFNMWKNNMVEQMHE  
E544 NFNMWKNNMVEQMHE Env 92 106

---

### Clade B+C 263-00:

3 CD8 PTE+, 1 CD4 PTE+

3 CD8+ regions, 1 CD4+ region

Number of overlapping peptides per region: CD8: 1 1 1 CD4: 1

### 3 CD8 responses:

C GRPGNFLOSRPEPT  
B GRPGNFLOSRPEPT  
G86 GRPGNFLO<sup>N</sup>RPEPT Gag 442 456

C PVHAGPIAPGQMRP  
B PVHAGPIAPGQMRP  
G213 PV<sup>Q</sup>AGPIAPGQMRP Gag 217 231

C VQQQSNLLRAIEAQQ  
B VQQQ<sup>N</sup>NLLRAIEAQQ  
E72 VQQQ<sup>N</sup>NLLRAIEA<sup>Q</sup>H Env 549 563

**1 CD4 response:**

C LLEESQNQQEKNEKD  
B L<sup>I</sup>EESQNQQEKNE<sup>Q</sup>E  
E49 L<sup>I</sup>EESQNQQEKNE<sup>Q</sup>D Env 645 659

---

**Clade B+C 311-00:**

5 CD8 PTE+, 0 CD4 PTE+

5 CD8+ regions, 0 CD4+ region

Number of overlapping peptides per region: CD8: 1 1 1 1 1 CD4: 0

**5 CD8 responses:**

C DRLHPVHAGPIAPGQ  
B DRLHPVHAGPIAPGQ  
G102 DR<sup>V</sup>HPVHAGPI<sup>P</sup>PGQ Gag 213 227

C GDIIGDIRQAHCNIS  
B <sup>G</sup>EIIGDIRQAHCNIS  
E64 GDIIGDIRQAHCNIS Env 321 334

C TGMLRNCQPWWIWGI  
B <sup>K</sup>GIR<sup>N</sup>Y<sup>Q</sup>HL<sup>W</sup>R<sup>W</sup>GT  
E459 <sup>K</sup>EIR<sup>N</sup>Y<sup>Q</sup>HL<sup>W</sup>R<sup>W</sup>GT Env 4 18

C MTKILEPFRAKNPEI  
B MTKILEPFR<sup>K</sup>QNP<sup>D</sup>I  
P144 MTKILEPFR<sup>K</sup>QNP<sup>D</sup>I Pol 319 333

C RAMASEFNLPPVVAK  
B RAMAS<sup>D</sup>FNLPVVAK  
P193 <sup>K</sup>AMAS<sup>D</sup>FNLPPIVAK Pol 735 749

---

**Clade B+C 335-96:**

6 CD8 PTE+, 0 CD4 PTE+

2 CD8+ regions, 0 CD4+ region

Number of overlapping peptides per region: CD8: 3 3 CD4: 0

**6 CD8 responses:**

|       |                                                 |     |     |     |
|-------|-------------------------------------------------|-----|-----|-----|
| C     | AAEWDRLHPVHAGPIAPGQ                             |     |     |     |
| B     | AAEWDRLHPVHAGPIAPGQ                             |     |     |     |
| G319  | AAE-DRLHPVHAGPI <b>P</b>                        | Gag | 209 | 225 |
| G44   | AEWDRLHPVHAGPIA                                 | Gag | 210 | 224 |
| G102  | DR <b>V</b> HHPVHAGPI <b>P</b> PGQ              | Gag | 213 | 227 |
| <hr/> |                                                 |     |     |     |
| C     | QLINKER <b>V</b> YLSWVPAHKGIG                   |     |     |     |
| B     | QLIK <b>K</b> E <b>K</b> VY <b>L</b> AWVPAHKGIG |     |     |     |
| P316  | KLIE <b>K</b> D <b>K</b> VYLSWVPA               | Pol | 679 | 693 |
| P223  | LIK <b>K</b> ERVYLSWVPAH                        | Pol | 680 | 694 |
| P83   | E <b>K</b> VYLSWVPAHKGIG                        | Pol | 684 | 698 |

**Clade B+C 414-95:**

0 CD8 PTE+, 1 CD4 PTE+

0 CD8+ regions, 1 CD4+ region

Number of overlapping peptides per region: CD8: 0 CD4: 1

**1 CD4 responses:**

|     |                                 |     |    |    |
|-----|---------------------------------|-----|----|----|
| C   | SLYNTVATLYCVHAG                 |     |    |    |
| B   | SLYNTVATLYCVH <b>Q</b> K        |     |    |    |
| G54 | SLYNTVATLYCVH <b>Q</b> <b>R</b> | Gag | 77 | 91 |

**Clade B+C 431-01:**

3 CD8 PTE+, 1 CD4 PTE+

2 CD8+ regions, 1 CD4+ region

Number of overlapping peptides per region: CD8: 2 1 CD4: 1

**3 CD8 responses:**

|       |                          |     |     |     |
|-------|--------------------------|-----|-----|-----|
| C     | HQAAMQMLKDTINEE          |     |     |     |
| B     | HQAAMQMLK <b>E</b> TINEE |     |     |     |
| G24   | HQAAMQMLKDTINEE          | Gag | 194 | 208 |
| G51   | HQAAMQMLK <b>E</b> TINEE | Gag | 194 | 208 |
| <hr/> |                          |     |     |     |
| C     | AVFIHNFKRKGGIGG          |     |     |     |
| B     | AVFIHNFKRKGGIGG          |     |     |     |
| P22   | AVFIHNFKRKGGIGG          | Pol | 894 | 908 |

**1 CD4 response:**

|     |                                            |     |    |     |
|-----|--------------------------------------------|-----|----|-----|
| C   | YFNMWKN <b>D</b> MVD <b>Q</b> MHE          |     |    |     |
| B   | NFNMWKN <b>N</b> M <b>V</b> E <b>Q</b> MHE |     |    |     |
| E44 | NFNMWKN <b>N</b> M <b>V</b> E <b>Q</b> MHE | Env | 92 | 106 |

---

## Reactive peptides and breadth and depth of responses: M Consensus Vaccine

### M consensus 349-07:

7 CD8 PTE+, 2 CD4 PTE+

3 CD8+ regions, 2 CD4+ regions

Number of overlapping peptides per region: CD8: 3 2 2 CD4: 1 1

### 3 CD8 responses:

Mcon EQATQDV**KNWMTDTLLV**QNaNP

G197 EQ**STQ**EVKNWMTDTL Gag 307 321

G128 ---TQDVKNWMTDTLL**I**Q Gag 310 324

G55 -----KNWMTDTLLVQNaNP Gag 314 328

Mcon **IVQQQSNLLRAIEA**QQ

E54 **VVQQQSNLLRAIEA**Q Env 548 562

E72 -VQQQ**N**LLRAIEAQ**H** Env 549 563

Mcon **AVFIHNFKRKGGIG**GY

P22 AVFIHNFKRKGGIG Pol 894 908

P236 -**V**L**I**HNFKRKGGIGGY Pol 895 909

### 2 CD4 responses:

Mcon **SELYKYKVVKIEPL**G

E42 SELYKYKVVKIEPLG Env 481 495

Mcon **NFNMWKNNMVEQ**MHE

E44 NFNMWKNNMVEQ**M**HE Env 92 106

---

### M consensus 350-07:

0 CD8 PTE+, 2 CD4 PTE+

0 CD8+ regions, 2 CD4+ regions

Number of overlapping peptides per region: CD8: none CD4: 1 1

### 2 CD4 responses:

Mcon **GKKKYRLKHLV**WASR

G232 **G**RKKKYRLKH**I**VWASR Gag 25 39

Mcon **DIKVVPRRKAKI**IRD

P173 DIKVVPRRK**V**KIIRD Pol 971 985

---

### M consensus 351-07:

7 CD8 PTE+, 1 CD4 PTE+

4 CD8+ regions, 1 CD4+ regions

Number of overlapping peptides per region: CD8: 2 2 2 1 CD4: 1

#### 4 CD8 responses:

|      |                      |     |    |    |
|------|----------------------|-----|----|----|
| Mcon | KHLVWASRELERFALNPGLL |     |    |    |
| G20  | KHLVWASRELERFAL      | Gag | 32 | 46 |
| G68  | -----ASRELERFAVNPGLL | Gag | 37 | 5  |

|      |                 |     |     |     |
|------|-----------------|-----|-----|-----|
| Mcon | IVQQQSNLLRAIEAQ |     |     |     |
| E6   | VVQQQSNLLRAIEAQ | Env | 548 | 562 |
| E8   | -VQQQNLLRAIEAQH | Env | 549 | 563 |

|      |                  |     |     |     |
|------|------------------|-----|-----|-----|
| Mcon | AVFIHNFKRKGGIGGY |     |     |     |
| P22  | AVFIHNFKRKGGIGG  | Pol | 894 | 908 |
| P236 | -VLIHNFKRKGGIGGY | Pol | 895 | 909 |

|      |                 |     |     |     |
|------|-----------------|-----|-----|-----|
| Mcon | KNWMTDTLLVQNANP |     |     |     |
| G55  | KNWMTDTLLVQNANP | Gag | 314 | 328 |

#### 1 CD4 response:

|      |                 |     |     |     |
|------|-----------------|-----|-----|-----|
| Mcon | WKGSPAIFQSSMTKI |     |     |     |
| P352 | WKGSPAIFQASMTKI | Pol | 308 | 322 |

---

#### M consensus 352-07:

6 CD8 PTE+, 2 CD4 PTE+

6 CD8+ regions, 2 CD4+ regions

Number of overlapping peptides per region: CD8: 1 1 1 1 1 1 CD4: 1

#### 6 CD8 responses:

|      |                 |     |    |    |
|------|-----------------|-----|----|----|
| Mcon | QPALQTGSEELRSLY |     |    |    |
| G268 | LPALKTGSEELRSLY | Gag | 65 | 79 |

|      |                 |     |     |     |
|------|-----------------|-----|-----|-----|
| Mcon | IVQQQSNLLRAIEAQ |     |     |     |
| E54  | VVQQQSNLLRAIEAQ | Env | 548 | 562 |

|      |                 |     |     |     |
|------|-----------------|-----|-----|-----|
| Mcon | CSGKLICTTTVPWNS |     |     |     |
| E73  | CSGKLICTTAVPWNS | Env | 598 | 612 |

|      |                 |     |    |    |
|------|-----------------|-----|----|----|
| Mcon | AKAYDTEVHNVWATH |     |    |    |
| E215 | AKAYEKVHNVWATH  | Env | 58 | 72 |

|      |                 |     |     |     |
|------|-----------------|-----|-----|-----|
| Mcon | KKDSTKWRKLVDFRE |     |     |     |
| P23  | KKDSTKWRKLVDFRE | Pol | 220 | 234 |

|      |                 |     |     |     |
|------|-----------------|-----|-----|-----|
| Mcon | VFIHNFKRKGGIGGY |     |     |     |
| P236 | VLIHNFKRKGGIGGY | Pol | 895 | 909 |

#### 2 CD4 responses:

Mcon **NKIVRMYSPPVSILDI**  
G13 NKIVRMYSPPVSILDI Gag 271 285

Mcon **KGNSSKVSNYPYPIVQ**  
G97 **TGNSSQ**VSNYPYPIVQ Gag 122 136

---

**M consensus 353-07:**

2 CD8 PTE+, 0 CD4 PTE+

2 CD8+ regions, 0 CD4+ regions

Number of overlapping peptides per region: CD8: 1 1 CD4: none

**2 CD8 responses:**

Mcon **GCKQIIGQLQPALQT**  
G151 GCR**QIL**GQLQP**SL**QT Gag 56 70

Mcon **PVHAGPIPPGQMREP**  
G213 PV**Q**AGPI**A**PGQMREP Gag 217 231

---

**M consensus 354-07:**

5 CD8 PTE+, 1 CD4 PTE+

3 CD8+ regions, 1 CD4+ regions

Number of overlapping peptides per region: CD8: 2 2 1 CD4: 1

**3 CD8 responses:**

Mcon EQATQDV**KNWMTDTLLVQ**NANP  
G197 EQ**STQ**E**VKNWMTDTL** Gag 307 321  
G55 -----**KNWMTDTLLVQ**NANP Gag 314 328

Mcon **IVQQSNLLRAIEAQQ**  
E54 **VVQQSNLLRAIEAQQ** Env 548 562  
E72 -**VQQQ****N**LLRAIEA**QH** Env 549 563

Mcon **HSNWRAMASDFNLPP**  
P93 HSNWRAMASDFNLPP Pol 731 745

**1 CD4 response:**

Mcon **GSPAIFQSSMTKILE**  
P141 GSPAIFQSSMTKIL**D** Pol 310 324

---

**M consensus 355-07:**

3 CD8 PTE+, 1 CD4 PTE+

2 CD8+ regions, 1 CD4+ regions

Number of overlapping peptides per region: CD8: 1 3 CD4: 1

**2 CD8 responses:**

Mcon **IIGDIRQAHCNISGT**



E325 ITGDIRQAHCNVSR**S** Env 322 336

Mcon SNWRAMASDFNLPP**I**VAK

P93 SNWRAMASDFNLPP Pol 731 745

P149 ---R**T**MASDFNLPP**V**VAK Pol 735 749

P193 ---**K**AMASDFNLPP**I**VAK Pol 735 749

### 1 CD4 response:

Mcon GSPAI**F**QSSMT**K**ILE

P141 GSPAI**F**QSSMT**K**IL**D** Pol 310 324

---

## Reactive peptides and breadth and depth of responses: Mosaic Vaccine

### Mosaic 356-07:

15 CD8 PTE+, 2 CD4 PTE+

8 CD8+ regions, 2 CD4+ regions

Number of overlapping peptides per region: CD8: 5 3 1 2 1 1 1 2 CD4: 1 1

### 8 CD8 responses:

Mos1 AA**E**WDRVHPVHAG**P**IAPGQ

Mos2 AA**E**WDR**L**HPVHAG**P**VAPGQ

G319 AA**E**-DR**L**HPVHAG**P****I****P** Gag 209 225

G44 -**A**EWDR**L**HPVHAG**P****I****A** Gag 210 224

G242 -**A**DWDR**L**HPVHAG**P****V****A** Gag 210 224

G277 ---WDRVHPVHAG**P****N****P**PG Gag 212 226

G102 ----DRVHPVHAG**P****I****P**PGQ Gag 213 227

Mos1 IV**Q**Q**Q**N**L**LRAIEA**Q**Q

Mos2 IV**Q**Q**S**N**L**LRAIEA**Q**Q

E54 **V**V**Q**Q**S**N**L**LRAIEA**Q** Env 548 562

E72 -V**Q**Q**Q**N**L**LRAIEA**Q****H** Env 549 563

E191 -V**Q**Q**S**N**L**L**K**AIEA**Q**Q Env 549 563

Mos1 **A**S**Q**DVKNWMT**E**T**L**L**V**

Mos2 **A**T**Q**DVKNWMT**D**T**L**L**V**

G66 **A**S**Q****E**VKNWMT**E**T**L**L**I** Gag 309 323

Mos1 AV**F**I**H**N**F**K**R**K**G**G**I**G**G**Y

Mos2 AV**F**I**H**N**F**K**R**K**G**G**I**G**E**Y

P22 AV**F**I**H**N**F**K**R**K**G**G**I**G**G** Pol 894 908

P236 -**V****L**I**H**N**F**K**R**K**G**G**I**G**G**Y Pol 895 909

Mos1 **P**L**V**K**L**W**Y**Q**L**E**K**D**P**I**A**

Mos2 **P**L**V**K**L**W**Y**Q**L**E**K****E****P**I**V**

|      |                              |     |     |     |
|------|------------------------------|-----|-----|-----|
| P73  | PLVKLWYQLEKE <b>EPIV</b>     | Pol | 576 | 590 |
| Mos1 | <b>TIPSTNNETPGIRYQ</b>       |     |     |     |
| Mos2 | <b>TIPSINN</b> ETPGIRYQ      |     |     |     |
| P79  | TIPS <b>I</b> NETPGIRYQ      | Pol | 286 | 300 |
| Mos1 | <b>YPGIKVRQLCKLLRG</b>       |     |     |     |
| Mos2 | <b>YAGIKVKQLCKLLRG</b>       |     |     |     |
| P156 | YPGIKVRQLCKLLRG              | Pol | 426 | 440 |
| Mos1 | LIKK <b>ERVYLSWVPAHKGIG</b>  |     |     |     |
| Mos2 | LIKKE <b>KVYLA</b> WVPAHKGIG |     |     |     |
| P223 | LIKKERVYLSWVPAH              | Pol | 680 | 694 |
| P83  | ---- <b>EKVYLSWVPAHKGIG</b>  | Pol | 684 | 698 |

**2 CD4 responses:**

|      |                         |     |     |     |
|------|-------------------------|-----|-----|-----|
| Mos1 | <b>SLYNTVATLYCVHQR</b>  |     |     |     |
| Mos2 | <b>SLFNTVATLYCVHAE</b>  |     |     |     |
| G54  | SLYNTVATLYCVHQR         | Gag | 77  | 91  |
| Mos1 | <b>ANPDCKTILKALGPA</b>  |     |     |     |
| Mos2 | <b>ANPDCKTILRALGPG</b>  |     |     |     |
| G63  | ANPDCKTIL <b>RALGPG</b> | Gag | 326 | 340 |

**Mosaic 357-07:**

29 CD8 PTE+, 4 CD4 PTE+

14 CD8+ regions, 4 CD4+ regions

Number of overlapping peptides per region: CD8: 5 2 2 5 5 2 1 1 1 1 1 1 1 1 1 1 1 CD4: 1 1 1 1

**14 CD8 responses:**

|      |                                |     |     |     |
|------|--------------------------------|-----|-----|-----|
| Mos1 | EQLIKK <b>ERVYLSWVPAHKGIG</b>  |     |     |     |
| Mos2 | EQLIKKE <b>KVYLA</b> WVPAHKGIG |     |     |     |
| P250 | <b>EPLIKKEKVYLSWVP</b>         | Pol | 678 | 692 |
| P316 | - <b>KLIEKDKVYLSWVPA</b>       | Pol | 679 | 693 |
| P223 | --LIKKERVYLSWVPAH              | Pol | 680 | 694 |
| P169 | ----- <b>EKVYLA</b> WVPAHKGIG  | Pol | 684 | 698 |
| P83  | ----- <b>EKVYLSWVPAHKGIG</b>   | Pol | 684 | 698 |

|      |                                  |     |     |     |
|------|----------------------------------|-----|-----|-----|
| Mos1 | IV <b>QQQN</b> LLRAIEAQQ         |     |     |     |
| Mos2 | IV <b>QQQS</b> LLRAIEAQQ         |     |     |     |
| E54  | <b>VVQQQS</b> LLRAIEAQQ          | Env | 548 | 562 |
| E72  | -V <b>QQQN</b> LLRAIEA <b>QH</b> | Env | 549 | 563 |

|      |                                   |     |     |     |
|------|-----------------------------------|-----|-----|-----|
| Mos1 | EQASQDV <b>KNWMTET</b> LLVQNANP   |     |     |     |
| Mos2 | EQATQDV <b>KNWMTD</b> LLVQNANP    |     |     |     |
| G197 | EQ <b>STQE</b> VKNWMT <b>D</b> TL | Gag | 307 | 321 |

|      |                                                                                       |     |     |     |
|------|---------------------------------------------------------------------------------------|-----|-----|-----|
| G55  | -----KNWMTD <b>T</b> LLVQ <b>N</b> ANP                                                | Gag | 314 | 328 |
| Mos1 | HSNWR <b>RAMASDFNLPP</b> V <b>V</b> AK                                                |     |     |     |
| Mos2 | HSNWR <b>RAMASEFNLPP</b> I <b>V</b> AK                                                |     |     |     |
| P93  | HSNWRAMAS <b>DFNLPP</b>                                                               | Pol | 731 | 745 |
| P262 | -SNWRAMAS <b>EFNLPP</b> I                                                             | Pol | 732 | 746 |
| P473 | --NWR <b>T</b> MAS <b>DFNLPP</b> V <b>I</b>                                           | Pol | 733 | 747 |
| P149 | ---- <b>R</b> T <b>M</b> AS <b>DFNLPP</b> V <b>V</b> AK                               | Pol | 735 | 749 |
| P193 | ---- <b>K</b> A <b>M</b> AS <b>DFNLPP</b> I <b>V</b> AK                               | Pol | 735 | 749 |
| Mos1 | AEW <b>DRVHPVHAGPI</b> APGQ                                                           |     |     |     |
| Mos2 | AEW <b>DR</b> L <b>H</b> PVHAG <b>P</b> V <b>A</b> PGQ                                |     |     |     |
| G319 | <b>A</b> A <b>E</b> DR <b>L</b> HPVHAG <b>P</b> I <b>P</b>                            | Gag | 209 | 225 |
| G242 | <b>A</b> DWDR <b>L</b> HPVHAG <b>P</b> V <b>A</b>                                     | Gag | 210 | 224 |
| G44  | AEWDR <b>L</b> HPVHAG <b>P</b> I <b>A</b>                                             | Gag | 210 | 224 |
| G277 | --WDRVHPVHAG <b>P</b> <b>N</b> <b>P</b> PG                                            | Gag | 212 | 226 |
| G102 | ---DRVHPVHAG <b>P</b> I <b>P</b> PGQ                                                  | Gag | 213 | 227 |
| Mos1 | AV <b>F</b> I <b>H</b> N <b>F</b> K <b>R</b> K <b>G</b> G <b>I</b> G <b>G</b> Y       |     |     |     |
| Mos2 | AV <b>F</b> I <b>H</b> N <b>F</b> K <b>R</b> K <b>G</b> G <b>I</b> G <b>E</b> Y       |     |     |     |
| P22  | AVFIHNFKRKG <b>G</b> I <b>G</b>                                                       | Pol | 894 | 908 |
| P236 | - <b>V</b> L <b>I</b> HNFKRKG <b>G</b> I <b>G</b> Y                                   | Pol | 895 | 909 |
| Mos1 | <b>PL</b> DE <b>G</b> FRKYTA <b>F</b> T <b>I</b> P                                    |     |     |     |
| Mos2 | <b>PL</b> DE <b>D</b> FRKYTA <b>F</b> T <b>I</b> P                                    |     |     |     |
| P242 | PLDE <b>S</b> FRKYTA <b>F</b> T <b>I</b> P                                            | Pol | 274 | 288 |
| Mos1 | <b>TR</b> ILEP <b>F</b> RA <b>K</b> N <b>P</b> E <b>I</b> V                           |     |     |     |
| Mos2 | <b>T</b> K <b>I</b> LEP <b>F</b> R <b>K</b> Q <b>N</b> P <b>D</b> I <b>V</b>          |     |     |     |
| P394 | <b>T</b> K <b>I</b> LEP <b>F</b> R <b>A</b> Q <b>N</b> P <b>E</b> L <b>V</b>          | Pol | 320 | 334 |
| Mos1 | <b>IC</b> EMEKEG <b>K</b> I <b>T</b> K <b>I</b> G                                     |     |     |     |
| Mos2 | <b>IC</b> <b>T</b> EMEKEG <b>K</b> I <b>S</b> K <b>I</b> G                            |     |     |     |
| P102 | IC <b>T</b> EMEKEG <b>K</b> I <b>S</b> K <b>I</b> G                                   | Pol | 192 | 206 |
| Mos1 | <b>V</b> K <b>L</b> W <b>Y</b> Q <b>L</b> E <b>K</b> D <b>P</b> I <b>A</b> G <b>V</b> |     |     |     |
| Mos2 | <b>V</b> K <b>L</b> W <b>Y</b> Q <b>L</b> E <b>K</b> E <b>P</b> I <b>V</b> G <b>A</b> |     |     |     |
| P200 | VKLWYQLEKD <b>P</b> I <b>V</b> G <b>A</b>                                             | Pol | 578 | 592 |
| Mos1 | <b>G</b> D <b>I</b> I <b>G</b> DIR <b>Q</b> A <b>H</b> C <b>N</b> I <b>S</b>          |     |     |     |
| Mos2 | <b>G</b> D <b>I</b> I <b>G</b> DIR <b>Q</b> A <b>H</b> C <b>N</b> L <b>S</b>          |     |     |     |
| E764 | GDIIGDIR <b>Q</b> A <b>H</b> C <b>N</b> I <b>S</b>                                    | Env | 321 | 334 |
| Mos1 | <b>I</b> C <b>T</b> T <b>T</b> V <b>P</b> W <b>N</b> A <b>S</b> W <b>S</b> N <b>K</b> |     |     |     |
| Mos2 | <b>I</b> C <b>T</b> T <b>A</b> V <b>P</b> W <b>N</b> T <b>S</b> W <b>S</b> N <b>K</b> |     |     |     |
| E334 | ICTTTVPWNASWS <b>N</b> <b>R</b>                                                       | Env | 603 | 617 |

|      |                          |     |     |     |
|------|--------------------------|-----|-----|-----|
| Mos1 | IGQVRDQAEHLKTAV          |     |     |     |
| Mos2 | IGQVRDQAEHLKTAV          |     |     |     |
| P174 | IGQVR <b>E</b> QAEHLKTAV | Pol | 877 | 891 |

|      |                                  |     |     |      |
|------|----------------------------------|-----|-----|------|
| Mos1 | GKQMAGADCVAGRQD                  |     |     |      |
| Mos2 | GKQMAG <b>D</b> DCV <b>S</b> RQD |     |     |      |
| P95  | GKQMAG <b>D</b> DCVAGRQD         | Pol | 987 | 1001 |

**4 CD4 responses:**

|      |                                  |     |     |     |
|------|----------------------------------|-----|-----|-----|
| Mos1 | KYAKMRTAHTNDVKQ                  |     |     |     |
| Mos2 | KY <b>A</b> MR <b>G</b> AHTNDVKQ |     |     |     |
| P474 | KYAKMRTAHTNDV <b>R</b> Q         | Pol | 508 | 522 |

|      |                                                  |     |     |     |
|------|--------------------------------------------------|-----|-----|-----|
| Mos1 | AGDIIGDIRQAHCNI                                  |     |     |     |
| Mos2 | <b>T</b> GDIIGDIRQAHC <b>N</b> L                 |     |     |     |
| E412 | <b>T</b> <b>G</b> <b>E</b> IIGDIRQAHC <b>N</b> L | Env | 320 | 333 |

|      |                                           |     |     |     |
|------|-------------------------------------------|-----|-----|-----|
| Mos1 | NQQEKNEKDLLALDS                           |     |     |     |
| Mos2 | NQQEKNE <b>Q</b> ELL <b>E</b> LD <b>K</b> |     |     |     |
| E68  | NQQEKNE <b>Q</b> DLLALD <b>K</b>          | Env | 651 | 665 |

|      |                                            |     |     |     |
|------|--------------------------------------------|-----|-----|-----|
| Mos1 | DIKVVPRRKVKI <b>I</b> KD                   |     |     |     |
| Mos2 | DIKVVPRRK <b>A</b> K <b>I</b> I <b>R</b> D |     |     |     |
| P173 | DIKVVPRRKVKI <b>I</b> <b>R</b> D           | Pol | 971 | 985 |

---

**Mosaic 358-07:**

19 CD8 PTE+, 3 CD4 PTE+

7 CD8+ regions, 3 CD4+ regions

Number of overlapping peptides per region: CD8: 2 4 2 6 3 1 1 CD4: 1 1 1

**7 CD8 responses:**

|      |                                       |     |     |     |
|------|---------------------------------------|-----|-----|-----|
| Mos1 | LIKKERVYLSWVPAHKGIG                   |     |     |     |
| Mos2 | LIKKE <b>K</b> VY <b>L</b> AWVPAHKGIG |     |     |     |
| P223 | LIKKERVYLSWVPAH                       | Pol | 680 | 694 |
| P83  | ---- <b>E</b> KVYLSWVPAHKGIG          | Pol | 684 | 698 |

|      |                                                         |     |     |     |
|------|---------------------------------------------------------|-----|-----|-----|
| Mos1 | IVQQQN <b>N</b> LLRAIEAQ <b>Q</b> HLLQL                 |     |     |     |
| Mos2 | IVQQQ <b>S</b> <b>N</b> LLRAIEAQ <b>Q</b> <b>H</b> MLQL |     |     |     |
| E54  | <b>V</b> VQQQ <b>S</b> <b>N</b> LLRAIEAQ                | Env | 548 | 562 |
| E191 | -VQQQ <b>S</b> <b>N</b> LL <b>K</b> AIEAQ <b>Q</b>      | Env | 549 | 563 |
| E72  | -VQQQN <b>N</b> LLRAIEAQ <b>H</b>                       | Env | 549 | 563 |
| E19  | ----- <b>N</b> LLRAIEAQ <b>Q</b> HLLQL                  | Env | 554 | 568 |

|      |                           |  |  |  |
|------|---------------------------|--|--|--|
| Mos1 | AVFIHNFKRKGGIGGY          |  |  |  |
| Mos2 | AVFIHNFKRKGGIG <b>E</b> Y |  |  |  |

|      |                  |     |     |     |
|------|------------------|-----|-----|-----|
| P222 | AVFIHNFKRKGGIGG  | Pol | 894 | 908 |
| P236 | -VLIHNFKRKGGIGGY | Pol | 895 | 909 |

|      |                        |     |     |     |
|------|------------------------|-----|-----|-----|
| Mos1 | EQASQDVKNWMTETLLVQNANP |     |     |     |
| Mos2 | EQATQDVKNWMTDTLLVQNANP |     |     |     |
| G122 | EQASQDVKNWMTETL        | Gag | 307 | 321 |
| G197 | EQSTQEVKNWMTDTL        | Gag | 307 | 321 |
| G66  | --ASQEVKNWMTETLLI      | Gag | 309 | 323 |
| G128 | ---TQDVKNWMTDTLLIQ     | Gag | 310 | 324 |
| G30  | -----KNWMTETLLVQNANP   | Gag | 314 | 328 |
| G55  | -----KNWMTDTLLVQNANP   | Gag | 314 | 328 |

|      |                    |     |     |     |
|------|--------------------|-----|-----|-----|
| Mos1 | AEWDRVHPVHAGPIAPGQ |     |     |     |
| Mos2 | AEWDRLHPVHAGPVAPGQ |     |     |     |
| G319 | AAEDRLHPVHAGPIP    | Gag | 209 | 225 |
| G44  | AEWDRLHPVHAGPIA    | Gag | 210 | 224 |
| G11  | ---DRVHPVHAGPIPPGQ | Gag | 213 | 227 |

|      |                 |     |     |     |
|------|-----------------|-----|-----|-----|
| Mos1 | WKGSPAIFQCSMTRI |     |     |     |
| Mos2 | WKGSPAIFQSSMTKI |     |     |     |
| P238 | WKGSPAIFQCSMTKI | Pol | 308 | 322 |

|      |                 |     |     |     |
|------|-----------------|-----|-----|-----|
| Mos1 | MTRILEPFRKNPEI  |     |     |     |
| Mos2 | MTKILEPFRKQNPDI |     |     |     |
| P144 | MTKILEPFRKQNPDI | Pol | 319 | 333 |

**3 CD4 responses:**

|      |                 |     |     |     |
|------|-----------------|-----|-----|-----|
| Mos1 | GSPAIFQCSMTRILE |     |     |     |
| Mos2 | GSPAIFQSSMTKILE |     |     |     |
| P141 | GSPAIFQSSMTKILD | Pol | 310 | 324 |

|      |                 |     |     |     |
|------|-----------------|-----|-----|-----|
| Mos1 | HGQVDCSPGIWQLAC |     |     |     |
| Mos2 | HGQVDCSPGIWQLAC |     |     |     |
| P25  | HGQVDCSPGIWQLDC | Pol | 766 | 780 |

|      |                 |     |     |     |
|------|-----------------|-----|-----|-----|
| Mos1 | DRFYKTLRAEQASQD |     |     |     |
| Mos2 | DRFFKTLRAEQATQD |     |     |     |
| G57  | DRFYKTLRAEQASQE | Gag | 298 | 312 |

---

**Mosaic 359-07:**

12 CD8 PTE+, 5 CD4 PTE+

10 CD8+ regions, 2 CD4+ regions

Number of overlapping peptides per region: CD8: 2 2 1 1 1 1 1 1 1 1 1 CD4: 3 2

**10 CD8 responses:**

Mos1 LIKKERVYLSWVPAHKGIG

|      |                                                            |     |     |     |
|------|------------------------------------------------------------|-----|-----|-----|
| Mos2 | LIKKE <b>K</b> VYLA <b>W</b> VPAHKGIG                      |     |     |     |
| P223 | LIKKE <b>R</b> VYLS <b>W</b> VPAH                          | Pol | 680 | 694 |
| P83  | ---- <b>E</b> KVYLS <b>W</b> VPAHKGIG                      | Pol | 684 | 698 |
| Mos1 | AEWDRVHPVHAGPI <b>A</b> PGQ                                |     |     |     |
| Mos2 | AEWDR <b>L</b> H <b>P</b> VHAG <b>P</b> V <b>A</b> PGQ     |     |     |     |
| G44  | AEWDR <b>L</b> H <b>P</b> VHAG <b>P</b> I <b>A</b>         | Gag | 210 | 224 |
| G102 | ---DRVHPVHAGPI <b>P</b> PGQ                                | Gag | 213 | 227 |
| Mos1 | <b>A</b> IFQ <b>C</b> SMTRILE <b>P</b> F <b>R</b>          |     |     |     |
| Mos2 | <b>A</b> IFQ <b>S</b> SMT <b>K</b> ILE <b>P</b> F <b>R</b> |     |     |     |
| P358 | <b>A</b> IFQ <b>S</b> SMTRILE <b>P</b> F <b>R</b>          | Pol | 313 | 327 |
| Mos1 | <b>A</b> SQI <b>Y</b> PGIKV <b>R</b> Q <b>L</b> CK         |     |     |     |
| Mos2 | <b>A</b> SQI <b>Y</b> <b>A</b> GIKV <b>K</b> Q <b>L</b> CK |     |     |     |
| P365 | <b>W</b> SQI <b>Y</b> <b>A</b> GIKV <b>R</b> Q <b>L</b> CK | Pol | 421 | 436 |
| Mos1 | <b>R</b> ELNK <b>R</b> TQDFWEV <b>Q</b> L                  |     |     |     |
| Mos2 | <b>R</b> ELNK <b>R</b> TQDFWEV <b>Q</b> L                  |     |     |     |
| P233 | RELN <b>R</b> RTQDFWEV <b>Q</b> L                          | Pol | 233 | 247 |
| Mos1 | <b>L</b> LRAIEAQ <b>Q</b> HLL <b>Q</b> LT                  |     |     |     |
| Mos2 | <b>L</b> LRAIEAQ <b>Q</b> H <b>M</b> L <b>Q</b> LT         |     |     |     |
| E227 | LL <b>M</b> AIEAQ <b>Q</b> HLL <b>Q</b> LT                 | Env | 555 | 569 |
| Mos1 | <b>L</b> ICTTT <b>V</b> PWNAS <b>S</b> WN                  |     |     |     |
| Mos2 | <b>L</b> ICTT <b>A</b> VPWNT <b>S</b> WN                   |     |     |     |
| E432 | <b>H</b> ICTT <b>N</b> VPWNAS <b>S</b> WN                  | Env | 602 | 616 |
| Mos1 | <b>K</b> HIVWASRELER <b>F</b> AV                           |     |     |     |
| Mos2 | <b>K</b> H <b>L</b> VWASRELER <b>F</b> AL                  |     |     |     |
| G20  | KH <b>L</b> VWASRELER <b>F</b> AL                          | Gag | 32  | 46  |
| Mos1 | <b>R</b> SLYNTVATLYCV <b>H</b> Q                           |     |     |     |
| Mos2 | <b>R</b> S <b>L</b> ENTVATLYCV <b>H</b> A                  |     |     |     |
| G220 | <b>K</b> SLYNTVAVLYCV <b>H</b> Q                           | Gag | 76  | 90  |
| Mos1 | <b>E</b> EKA <b>F</b> SPEV <b>I</b> PM <b>F</b> SA         |     |     |     |
| Mos2 | <b>E</b> EKA <b>F</b> SPEV <b>I</b> PM <b>F</b> TA         |     |     |     |
| G14  | EEKA <b>F</b> SPEV <b>I</b> PM <b>F</b> SA                 | Gag | 160 | 174 |

## 2 CD4 responses:

|      |                                                                    |     |     |     |
|------|--------------------------------------------------------------------|-----|-----|-----|
| Mos1 | WKGSPA <b>I</b> FQ <b>C</b> SMTRILE <b>P</b> F <b>R</b> A          |     |     |     |
| Mos2 | WKGSPA <b>I</b> FQ <b>S</b> SMT <b>K</b> ILE <b>P</b> F <b>R</b> K |     |     |     |
| P352 | WKGSPA <b>I</b> FQ <b>A</b> SMT <b>K</b> I                         | Pol | 308 | 322 |
| P141 | --GSPA <b>I</b> FQ <b>S</b> SMT <b>K</b> I <b>L</b> D              | Pol | 310 | 324 |

|      |                                  |     |     |     |
|------|----------------------------------|-----|-----|-----|
| P284 | -----IFQCSMTKILEPFRA             | Pol | 314 |     |
| Mos1 | KARVLAEAMSQVTNSAT                |     |     |     |
| Mos2 | KARVLAEAMSQ <b>T</b> NSTIL       |     |     |     |
| G234 | KA <b>K</b> VLAEAMSQV <b>QQT</b> | Gag | 359 | 373 |
| G91  | -- <b>R</b> VLAEAMSQVTNSAT       | Gag | 361 | 375 |

---

**Mosaic 360-07:**

16 CD8 PTE+, 2 CD4 PTE+

12 CD8+ regions, 2 CD4+ regions

Number of overlapping peptides per region: CD8: 2 2 3 1 1 1 1 1 1 1 1 1 CD4: 1 1

**12 CD8 responses:**

|      |                           |     |     |     |
|------|---------------------------|-----|-----|-----|
| Mos1 | SDLEIGQHR <b>A</b> KIEELR |     |     |     |
| Mos2 | SDLEIGQHR <b>T</b> KIEELR |     |     |     |
| P385 | SDLEIGQHR <b>I</b> KIEEL  | Pol | 346 | 360 |
| P133 | -DLEIGQHR <b>A</b> KIEELR | Pol | 347 | 361 |

|      |                           |     |     |     |
|------|---------------------------|-----|-----|-----|
| Mos1 | QMHEDIISLWDQSLKP          |     |     |     |
| Mos2 | QMHEDI <b>I</b> RLWDQSLKP |     |     |     |
| E282 | HMHEDIISLWD <b>E</b> SLK  | Env | 103 | 117 |
| E292 | -MHED <b>V</b> ISLWDQSLKP | Env | 104 | 118 |

|      |                                    |     |     |     |
|------|------------------------------------|-----|-----|-----|
| Mos1 | EEKAFSPEVIPMF <b>S</b> AL          |     |     |     |
| Mos2 | EEKAFSPEVIPMF <b>T</b> AL          |     |     |     |
| G14  | EEKAFSPEVIPMF <b>S</b> A           | Gag | 160 | 174 |
| G192 | EEK <b>G</b> FNPEVIPMF <b>S</b> A  | Gag | 160 | 174 |
| G111 | -EK <b>G</b> FSPEVIPMF <b>T</b> AL | Gag | 161 | 175 |

|      |                                   |     |     |     |
|------|-----------------------------------|-----|-----|-----|
| Mos1 | KYTAFTIPSTNN <b>E</b> TP          |     |     |     |
| Mos2 | KYTAFTIP <b>S</b> INN <b>E</b> TP |     |     |     |
| P286 | KYTAFTIPSTNN <b>E</b> TP          | Pol | 281 | 295 |

|      |                                   |     |     |     |
|------|-----------------------------------|-----|-----|-----|
| Mos1 | EKIKALTAICE <b>E</b> MEK          |     |     |     |
| Mos2 | EKIKAL <b>V</b> EIC <b>T</b> EMEK |     |     |     |
| P439 | EKI <b>E</b> ALTAICE <b>E</b> MEK | Pol | 184 | 198 |

|      |                                                   |     |     |     |
|------|---------------------------------------------------|-----|-----|-----|
| Mos1 | GKYAKMRTAHTND <b>V</b> K                          |     |     |     |
| Mos2 | GKYA <b>R</b> MR <b>G</b> AHTND <b>V</b> K        |     |     |     |
| P444 | GKYA <b>R</b> MR <b>G</b> AHTND <b>V</b> <b>R</b> | Pol | 507 | 521 |

|      |                                          |     |     |     |
|------|------------------------------------------|-----|-----|-----|
| Mos1 | LPIQKETWETW <b>W</b> TDY                 |     |     |     |
| Mos2 | LPIQKETWE <b>A</b> W <b>T</b> E <b>Y</b> |     |     |     |
| P358 | LPIQKETWE <b>A</b> W <b>T</b> E <b>Y</b> | Pol | 546 | 560 |

|      |                          |  |  |  |
|------|--------------------------|--|--|--|
| Mos1 | WYQLEKDPIAG <b>V</b> ETF |  |  |  |
|------|--------------------------|--|--|--|

Mos2 **WYQLEKEPIVGAETF**  
 P370 WYQLEKDP**IA**GAETF Pol 581 595

Mos1 **ENVTFENFNMWKNNMV**  
 Mos2 **ENVTFENFNMWKNDMV**  
 E273 ENVTF**E**FNMWKNNMV Env 87 101

Mos1 **VIQDNSDIKVVPRRK**  
 Mos2 **VIQDNSDIKVVPRRK**  
 P765 VIQDNSDIKVVPRRK Pol 965 979

Mos1 **VSQNYPIVQNIQGQM**  
 Mos2 **VSQNYPIVQNLQGQM**  
 G29 VSQNYPIVQ**N**LQGQM Gag 128 142

Mos1 **VLAEAMSQVTNSATIM**  
 Mos2 **VLAEAMSQ-TNSTILM**  
 G307 VLAEAMSQ-**AQQT**NI**M** Gag 362 377

**2 CD4 responses:**

Mos1 **HGQVDCSPGIWQLAC**  
 Mos2 **HGQVDCSPGIWQLAC**  
 P25 HGQVDCSPGIWQL**D**C Pol 766 780

Mos1 **RVLAEAMSQVTNSAT**  
 Mos2 **RVLAEAMSQTNSTIL**  
 G305 RVLAEAMSQ**TNSA**IL Gag 361 376

---

**Mosaic 361-07:**

21 CD8 PTE+, 6 CD4 PTE+

7 CD8+ regions, 5 CD4+ regions

Number of overlapping peptides per region: CD8: 6 2 4 2 5 1 1 CD4: 2 1 1 1 1

**7 CD8 responses:**

Mos1 **EQLIKKERVYLSWVPAHKGIG**  
 Mos2 **EQLIKKEKVYLAWVPAHKGIG**  
 P221 **E**LI**K**KE**KVYLA**WVP Pol 678 692  
 P250 **E**PLIK**KEKVYLS**WVP Pol 678 692  
 P316 -**K**LI**E****KDKVYLS**WVPA Pol 679 693  
 P223 --LIKKERVYLSWVPAH Pol 680 694  
 P169 -----**EKVYLA**WVPAHKGIG Pol 684 698  
 P83 -----**EKVYLS**WVPAHKGIG Pol 684 698

Mos1 **CTHGIRPVVSTQLLL**  
 Mos2 **CTHGIKPVVSTQLLL**  
 E15 CTHGI**K**PVVSTQLLL Env 247 261



|                         |                                            |     |     |     |
|-------------------------|--------------------------------------------|-----|-----|-----|
| E47                     | CTHGIRPVVSTQLLL                            | Env | 247 | 261 |
| Mos1                    | ICTTTVPWNASWSNKSL                          |     |     |     |
| Mos2                    | ICTTAVPWNTSWSNKSQ                          |     |     |     |
| E334                    | ICTTTVPWNASWSNR                            | Env | 603 | 617 |
| E214                    | -CTTTVPWNSWSNK <del>T</del>                | Env | 604 | 618 |
| E158                    | --TTAVPWNASWSNKSL                          | Env | 605 | 619 |
| E290                    | --TTAVPWNTSWSNKSL                          | Env | 605 | 619 |
| Mos1                    | ACQGVGGPGHKARVLAEAMS                       |     |     |     |
| Mos2                    | ACQGVGGPSHKARVLAEAMS                       |     |     |     |
| G166                    | ACQEVGGPGHKARVL                            | Gag | 349 | 363 |
| G76                     | -----GGPSHKARVLAEAMG                       | Gag | 354 | 368 |
| Mos1                    | AAEWD <del>R</del> VHPVHAGPIAPGQ           |     |     |     |
| Mos2                    | AAEWDRLHPVHAGPVAPGQ                        |     |     |     |
| G319                    | AAE-DRLHPVHAGPI <del>P</del>               | Gag | 209 | 225 |
| G242                    | -ADWDRLHPVHAGPVA                           | Gag | 210 | 224 |
| G44                     | -AEWDRLHPVHAGPIA                           | Gag | 210 | 224 |
| G277                    | ---WDRVHPVHAGP <del>N</del> PG             | Gag | 212 | 226 |
| G102                    | ----DRVHPVHAGPI <del>P</del> PGQ           | Gag | 212 | 226 |
| Mos1                    | HSNWRAMASDFNLPP                            |     |     |     |
| Mos2                    | HSNWRAMASEFNLPP                            |     |     |     |
| P93                     | HSNWRAMASDFNLPP                            | Pol | 731 | 745 |
| Mos1                    | KGRPGN <del>F</del> LQNRPEPT               |     |     |     |
| Mos2                    | KGRPGN <del>F</del> LQ <del>S</del> RPEPT  |     |     |     |
| G86                     | KGRPGN <del>F</del> LQNRPEPT               | Gag | 442 | 456 |
| <b>5 CD4 responses:</b> |                                            |     |     |     |
| Mos1                    | RSLYNTVATLYCVHQ <del>R</del>               |     |     |     |
| Mos2                    | RSL <del>E</del> NTVATLYCVH <del>A</del> E |     |     |     |
| G289                    | KSL <del>E</del> NTVATLYCVH <del>A</del>   | Gag | 76  | 90  |
| G54                     | -SLYNTVATLYCVHQ <del>R</del>               | Gag | 77  | 91  |
| Mos1                    | YVTD <del>R</del> GRQKIVSLTE               |     |     |     |
| Mos2                    | YVTD <del>R</del> GRQ <del>V</del> VSLTD   |     |     |     |
| P134                    | YVTD <del>R</del> GRQ <del>V</del> VSLTE   | Pol | 612 | 626 |
| Mos1                    | CTTTVPWNASWSNKS                            |     |     |     |
| Mos2                    | CTTAVPWNTSWSNKS                            |     |     |     |
| E53                     | CTT <del>N</del> VPWNSWSNKS                | Env | 604 | 618 |
| Mos1                    | WWAGIQQEFGIPYNP                            |     |     |     |
| Mos2                    | WWAGIKQEFGIPYNP                            |     |     |     |

|      |                          |     |     |     |
|------|--------------------------|-----|-----|-----|
| P135 | WWAGIQQEFGIPYNP          | Pol | 846 | 860 |
| Mos1 | <b>GP</b> GHKARVLAEAMSQ  |     |     |     |
| Mos2 | <b>GP</b> SHKARVLAEAMSQ  |     |     |     |
| G15  | GP <b>G</b> HKARVLAEAMSQ | Gag | 355 | 369 |

---

**Mosaic 362-07:**

13 CD8 PTE+, 5 CD4 PTE+

7 CD8+ regions, 5 CD4+ regions

Number of overlapping peptides per region: CD8: 2 2 4 2 1 1 1 CD4: 1 1 1 1 1

**7 CD8 responses:**

|      |                                                             |     |     |     |
|------|-------------------------------------------------------------|-----|-----|-----|
| Mos1 | <b>CT</b> HGIRPVVSTQLLL                                     |     |     |     |
| Mos2 | <b>CT</b> HG <b>I</b> KPVVSTQLLL                            |     |     |     |
| E15  | CTHG <b>I</b> KPVVSTQLLL                                    | Env | 247 | 261 |
| E47  | CTHG <b>I</b> RPVVSTQLLL                                    | Env | 247 | 261 |
| Mos1 | KHIV <b>W</b> ASRELERFAVNPGLL                               |     |     |     |
| Mos2 | KHLV <b>W</b> ASRELER <b>F</b> ALNPGLL                      |     |     |     |
| G20  | KHLV <b>W</b> ASRELER <b>F</b> AL                           | Gag | 32  | 46  |
| G68  | -----ASRELERFAVNPGLL                                        | Gag | 37  | 51  |
| Mos1 | QPSLQ <b>T</b> G <b>S</b> EELRSLYNTVATL                     |     |     |     |
| Mos2 | QP <b>A</b> LQ <b>T</b> G <b>T</b> EELRS <b>L</b> FNTVATL   |     |     |     |
| G268 | <b>L</b> P <b>A</b> L <b>K</b> TG <b>S</b> EELRS <b>L</b> Y | Gag | 65  | 79  |
| G249 | -- <b>A</b> LQ <b>T</b> G <b>S</b> EELRS <b>L</b> FNT       | Gag | 67  | 81  |
| G132 | ---LQ <b>T</b> G <b>T</b> EELRS <b>L</b> FNTV               | Gag | 68  | 82  |
| G120 | -----G <b>S</b> EELRS <b>L</b> YNTVATL                      | Gag | 71  | 85  |
| Mos1 | ACQGV <b>G</b> PGHKARVLAEAMS                                |     |     |     |
| Mos2 | ACQGV <b>G</b> PG <b>S</b> HKARVLAEAMS                      |     |     |     |
| G166 | ACQ <b>E</b> VGGPGHKARVL                                    | Gag | 349 | 363 |
| G76  | -----GGP <b>S</b> HKARVLAEAM <b>G</b>                       | Gag | 354 | 368 |
| Mos1 | <b>REL</b> NKRTQDFWEVQL                                     |     |     |     |
| Mos2 | <b>REL</b> NKRTQDFWEVQL                                     |     |     |     |
| P233 | REL <b>N</b> RRTQDFWEVQL                                    | Pol | 233 | 247 |
| Mos1 | <b>LL</b> RAIEAQ <b>Q</b> HLLQ <b>L</b> T                   |     |     |     |
| Mos2 | <b>LL</b> RAIEAQ <b>Q</b> H <b>M</b> LQ <b>L</b> T          |     |     |     |
| E227 | LL <b>M</b> AIEAQ <b>Q</b> HLLQ <b>L</b> T                  | Env | 555 | 569 |
| Mos1 | <b>KT</b> AVQMAVFIHNFKR                                     |     |     |     |
| Mos2 | <b>KT</b> AVQMAVFIHNFKR                                     |     |     |     |
| P5   | <b>KT</b> AVQMAVFIHNFKR                                     | Pol | 888 | 902 |

#### 5 CD4 responses:

|      |                 |     |     |     |
|------|-----------------|-----|-----|-----|
| Mos1 | KLNWASQIYPGIKVR |     |     |     |
| Mos2 | KLNWASQIYAGIKVK |     |     |     |
| P136 | KLNWASQIYAGIKVK | Pol | 418 | 432 |
|      |                 |     |     |     |
| Mos1 | YAKMRTAHTNDVKQL |     |     |     |
| Mos2 | YARMRGAHTNDVKQL |     |     |     |
| P266 | YARKRSAHTNDVKQL | Pol | 509 | 523 |
|      |                 |     |     |     |
| Mos1 | DQAEHLKTAVQMAVF |     |     |     |
| Mos2 | DQAEHLKTAVQMAVF |     |     |     |
| P28  | DQAEHLKTAVQMAVF | Pol | 882 | 896 |
|      |                 |     |     |     |
| Mos1 | SLQTGSEELRSLYNT |     |     |     |
| Mos2 | ALQTGTEELRSLENT |     |     |     |
| G182 | ALKTGTEELRSLYNT | Gag | 67  | 81  |
|      |                 |     |     |     |
| Mos1 | GPGHKARVLAEAMSQ |     |     |     |
| Mos2 | GPSHKARVLAEAMSQ |     |     |     |
| G15  | GPGHKARVLAEAMSQ | Gag | 355 | 369 |

---

## Reactive peptides and breadth and depth of responses: Optimal Natural Clade C Vaccine

#### Natural Clade C 363-07:

2 CD8 PTE+, 0 CD4 PTE+  
1 CD8+ regions, 0 CD4+ regions  
Number of overlapping peptides per region: CD8: 2 CD4: none

#### 1 CD8 responses:

|      |                       |  |  |  |
|------|-----------------------|--|--|--|
| C    | QPALQTGTEELRSLYNTVATL |  |  |  |
| G268 | LPALKTGSEELRSLY       |  |  |  |
| G120 | -----GSEELRSLYNTVATL  |  |  |  |

---

#### Natural Clade C 364-07:

5 CD8 PTE+, 2 CD4 PTE+  
5 CD8+ regions, 2 CD4+ regions  
Number of overlapping peptides per region: CD8: 1 1 1 1 1 CD4: 1 1

#### 5 CD8 responses:

|     |                 |     |     |     |
|-----|-----------------|-----|-----|-----|
| C   | AHTNDVKQLTEAVQK |     |     |     |
| P80 | AHTNDVKQLTEAVQK | Pol | 515 | 529 |
|     |                 |     |     |     |
| C   | GDIIGDIRQAHCNIS |     |     |     |
| E64 | GDIIGDIRQAHCNIS | Env | 321 | 334 |

|      |                         |     |     |     |
|------|-------------------------|-----|-----|-----|
| C    | <b>SEKSAVGIGAVFLGF</b>  |     |     |     |
| E182 | REKRAVGLGAVFLGF         | Env | 508 | 522 |
| C    | <b>RASILRGGKLDKWEK</b>  |     |     |     |
| G283 | SASILRGGKLDKWEK         | Gag | 4   | 18  |
| C    | <b>TNNPPVPVGDIIYKRW</b> |     |     |     |
| G185 | TNNPPVPVGDIIYKRW        | Gag | 251 | 265 |

**2 CD4 responses:**

|      |                        |     |     |     |
|------|------------------------|-----|-----|-----|
| C    | <b>CKSNITGLLLTRDGG</b> |     |     |     |
| E316 | CKSNITGLLLVRDGG        | Env | 445 | 459 |

|     |                        |     |    |    |
|-----|------------------------|-----|----|----|
| C   | <b>SLYNTVATLYCVHAG</b> |     |    |    |
| G54 | SLYNTVATLYCVHQR        | Gag | 77 | 91 |

---

**Natural Clade C 365-07:**

2 CD8 PTE+, 1 CD4 PTE+  
 2 CD8+ regions, 1 CD4+ regions  
 Number of overlapping peptides per region: CD8: 1 1 CD4: 1

**2 CD8 responses:**

|      |                        |     |     |     |
|------|------------------------|-----|-----|-----|
| C    | <b>EQLINKERVYLSWVP</b> |     |     |     |
| P250 | EPLIKKKEKVYLSWVP       | Pol | 678 | 692 |

|     |                        |     |     |     |
|-----|------------------------|-----|-----|-----|
| C   | <b>AEWDRLHPVHAGPIA</b> |     |     |     |
| G44 | AEWDRLHPVHAGPIA        | Gag | 210 | 224 |

**1 CD4 response:**

|     |                        |     |     |     |
|-----|------------------------|-----|-----|-----|
| C   | <b>HQAAMQMLKDTINEE</b> |     |     |     |
| G24 | HQAAMQMLKDTINEE        | Gag | 194 | 208 |

---

**Natural Clade C 366-07:**

6 CD8 PTE+, 1 CD4 PTE+  
 4 CD8+ regions, 1 CD4+ regions  
 Number of overlapping peptides per region: CD8: 2 2 1 1 CD4: 1

**4 CD8 responses:**

|     |                          |     |     |     |
|-----|--------------------------|-----|-----|-----|
| C   | <b>IVQQQSNNLLRAIEAQQ</b> |     |     |     |
| E54 | VVQQQSNNLLRAIEAQ         | Env | 548 | 562 |
| E72 | -VQQQNLLRAIEAQH          | Env | 549 | 563 |

|      |                         |     |     |     |
|------|-------------------------|-----|-----|-----|
| C    | <b>AVFIHNFKRKGGIGGY</b> |     |     |     |
| P22  | AVFIHNFKRKGGIGG         | Pol | 894 | 908 |
| P236 | -VLIHNFKRKGGIGGY        | Pol | 895 | 909 |

C MAICEEMEKEGKITK  
P224 TAICEEMEKEGKITK Pol 190 204

C GGPSHKARVLAEAMS  
G76 GGPSHKARVLAEAMG Gag 354 368

**1 CD4 response:**

C IIGQVRDQAEHLKTA  
P86 LIIGQVRDQAEHLKTA Pol 876 890

---

**Natural Clade C 367-07:**

0 CD8 PTE+, 0 CD4 PTE+  
0 CD8+ regions, 0 CD4+ regions  
Number of overlapping peptides per region: none

**0 CD8 responses**

**0 CD4 responses**

---

**Natural Clade C 368-07:**

2 CD8 PTE+, 0 CD4 PTE+  
1 CD8+ regions, 0 CD4+ regions  
Number of overlapping peptides per region: CD8: 2 CD4: 0

**1 CD8 response**

C AVFIHNFKRKGGIGGY  
P22 AVFIHNFKRKGGIGG Pol 894 908  
P236 -VLIHNFKRKGGIGGY Pol 895 909

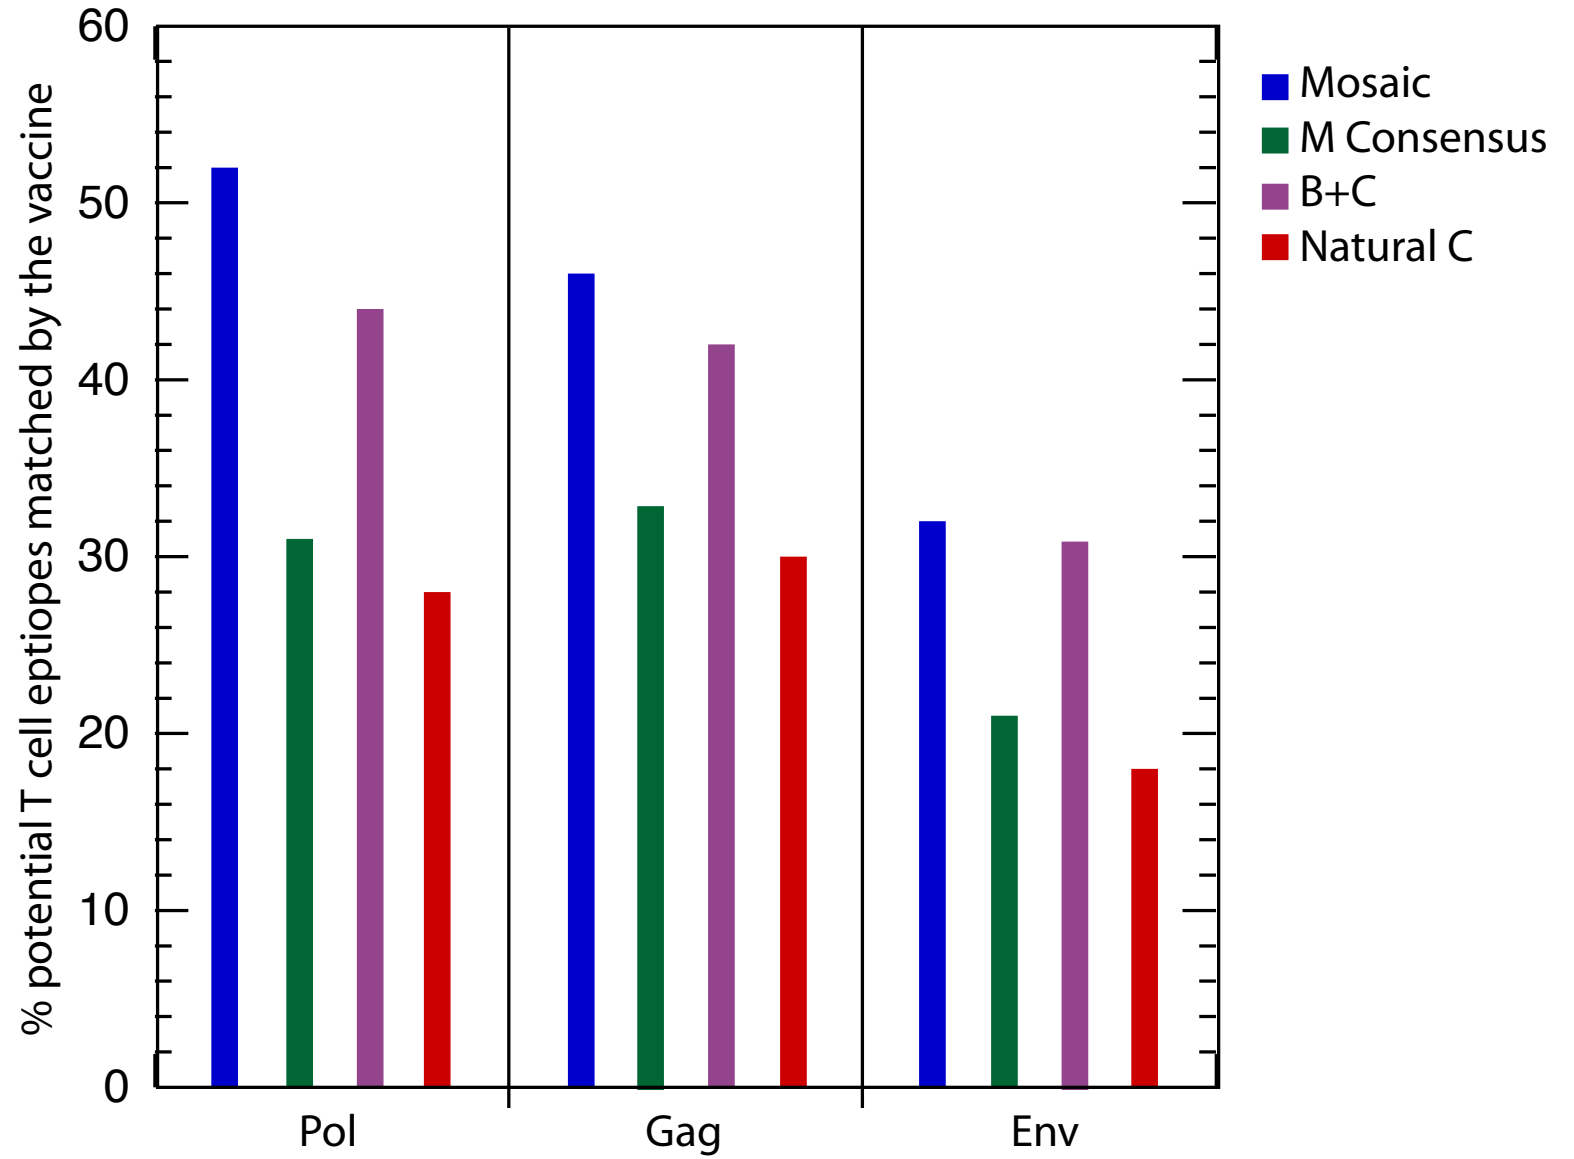

Mosaic 1 Env

MRVTGIRKNYQHLWRWGTMLLGILMCSAAGKLWVTVYYGVPVWKEATTLF  
CASDAKAYDTEVHNVWATHACVPTDPNPQEVLENVTENFNMWKNNMVEQM  
HEDIISLWDQSLKPCVKLTPLCVTLNCTDDVRNVTNNATNTNSSWGEPMEKGEI  
KNCSFNITTSIRNKVQKQYALFYKLDVVPIDNDSNNTNYRLISCNTSVITQACPKV  
SFEPIPIHYCAPAGFAILKCNDKKFNGTGPCNTVSTVQCTHGIRPVVSTQLLNGS  
LAEDEVVIRSENFNTNAKTIMVQLNVSVEINCTRPNNNTRKSIHIGPGRAFYTAGD  
IIGDIRQAHCNISRANWNNTLRQIVEKLGKQFGNKTIVFNHSSGGDPEIVMHSFN  
CGGEFFYCNSTKLFNSTWTWNNSTWNNTKRSNDTEEHITLPCRKQIINMWQEV  
GKAMYAPPIRGQIRCSSNITGLLLTRDGGNDTSGTEIFRPGGGDMRDNRSELYK  
YKVVKIEPLGVAPTKAKRRVVQSEKSAVGIGAVFLGFLGAAGSTMGAASMTLT  
VQARLLLSGIVQQQNNLLRAIEAQQHLLQLTVWGKQLQARVLAVERYLKDQQL  
LGIWGCSGKLICTTTVPWNASWSNKS LDKIWNMTWMEWEREINNYTSLIYTLI  
EESQNQEKNEQELLELDKWASLWNWFDISNWLW

Mosaic 2 Env

MRVIRGIQRNWPQWWIWGILGFWMIIICRVMGNLWVTVYYGVPVWKEAKTTLF  
CASDAKAYEKEVHNVWATHACVPTDPNPQEMVLENVTENFNMWKNDMVDQM  
HEDIIRLWDQSLKPCVKLTPLCVTLECRNVRNVSSNGTYNIIHNETYKEMKNCSF  
NATTVVEDRKQKVHALFYRLDIVPLDENNSSEKSSSENSSEYYRLINCNTSAITQA  
CPKVSFDPIPIHYCAPAGYAILKCNNKTFNGTGPCNNVSTVQCTHGKIPVSTQLL  
LNGSLAEIIIIRSENLTNNAKTIIVHLNETVNITCTRPNNNTRKSIRIGPGQTFYAT  
GDIIGDIRQAHCNLSRDGWNKTLQGVKKKLAEHFPNKTINFTSSSGGDLEITTHSF  
NCRGEFFYCNTSGLFNGTYPNGTNSNSSNITLPCRKQIINMWQEVGRAMYAP  
PIAGNITCRSNITGLLLTRDGGSNNGVPNDTETFRPGGGDMRNNWRSELYKYKV  
VEVKPLGVAPTEAKRRVVESEKSAVGIGAVFLGILGAAGSTMGAASITLTVQAR  
QLLSGIVQQQSNLLRAIEAQQHMLQLTVWGKQLQTRVLAIERYLQDQQLGLW  
GCSGKLICTTAVPWNTSWSNKSQTDIWDNMTWMQWDKEIGNYTGEIYRLLEES  
QNQEKNEKDLLALDSWKNLWNWFDITNWLW

M Consensus Env

MRVIRGIQRNCQHLWRWGTLLGLMLMCSAAENLWVTVYYGVPVWKEANTTLF  
CASDAKAYDTEVHNVWATHACVPTDPNPQEVLENVTENFNMWKNNMVEQM  
HEDIISLWDQSLKPCVKLTPLCVTLNCTNVNVTNTNNTNTEEKGEIKNCSFNITTEI  
RDKKQKVYALFYRLDVVPIDNNSNNSNYRLINCNTSAITQACPKVSFEPIPIHYC  
APAGFAILKCNDKKFNGTGPCKNVSTVQCTHGKIPVSTQLLNGSLAEIIIIRS  
ENITNNAKTIIVQLNESVEINCTRPNNNTRKSIRIGPGQAFYATGDIIGDIRQAHCNI  
SGTKWNKTLQQVAKKLEHFNNKTIIFKPSSGGDLEITTHSFNCRGEFFYCNTSG  
LFNSTWIGNGTKNNNNNTNDTITLPCRKQIINMWQGVGQAMYAPPIEGKITCKSNI  
TGLLLTRDGGNNNTNETEIFRPGGGDMRDNRSELYKYKVVKIEPLGVAPTKAK  
RRVVESEKSAVGIGAVFLGFLGAAGSTMGAASITLTVQARQLLSGIVQQQSNLLR  
AIEAQQHLLQLTVWGKQLQARVLAVERYLKDQQLLGIWGCSGKLICTTTVPWN  
SSWSNKSQDEIWDNMTWMEWEREINNYTDIISLIEESQNQEKNEQELLALDK  
WASLWNWFDITNWLW

Clade C Env

MRVTGMLRNCQPWWIWGILGFWMLLIYNVGGNLWVTVYYGVPVWKEAKTTL  
FCASDAKAYEKEVHNVWATHACVPTDPNPQEMVLENTVEYFNMWKNMVDQ  
MHEDIISLWDQSLKPCVKLTPLCVTLNCRNVTTSSNATSNDNPNGEIKNCSFNITT  
ELRDKRRNEYALFYRLDIVPLSGSKNSSNSSEYRLINCNTSAITQACPKVSFDPIPI  
HYCAPAGYAILKCNNKTFNGTGPCNNVSTVQCTHGIKPVVSTQLLLNGSLAEGEI  
IIRSENLTNNAKTIIVHLNESIEIVCARPNNNTRKSMRIGPGQTFYATGDIIGDIRQA  
HCNISGNWNATLEKVKGKLEHFPKGKISFEPSSGGDLEITTHSFNCRGEFFYCDT  
SKLFNGTTHTANSSITIQCRIKQIINMWQGVGRAIYAPPIAGNITCKSNITGLLLTR  
DGGTLNNDTEKFRPGGDMRDNRSELYKYKVVVEIKPLGIAPTKAKRRVVESE  
KSAVGIGAVFLGFLGAAGSTMGAASITLTVQARQLLSGIVQQQSNLLRAIEAQQH  
MLQLTVWGIKQLQTRVLAIERYLKDDQLLGIWGCSSGKIICTTAVPWNTSWSNKS  
LEDIWDNMTWMQWDREINNYTSIIYSLLEESQNQQEKNEKDLLALDSWNNLWN  
WFNITKWLW

Mosaic 1 Gag

MGARASVLSGGELDRWEKIRLRPGGKKKYRLKHIVWASRELERFAVNPGLLETS  
EGCRQILGQLQPSLQTGSEELRSLYNTVATLYCVHQRIEIKDTKEALEKIEEEQNK  
SKKKAQQAADTGNSSQVSQNYPIVQNIQGGQMVHQAI SPRTLNAWVKVVEEKA  
FSPEVPMFSALSEGATPQDLNMLNTVGGHQAAMQMLKETINEEAAEWDRVH  
PVHAGPIAPGQMREPRGSDIAGTTSTLQEQIGWMTNPPPIPVGEIYKRWIILGLNK  
IVRMYSVPSILDIRQGPKEPFRDYVDRFYKTLRAEQASQDVKNWMTETLLVQNA  
NPDKTILKALGPAATLEEMMTACQGVGGPGHKARVLAEAMSQVTNSATIMMQ  
RGNFRNQRKTVKCFNCGKEGHIKNCRAPRKKGCWKCCKEGHQMKDCTERQA  
NFLGKIWPSNKGPRGNFLQNRPEPTAPPEESFRFGEETTPSQKQEPIDKEMYPLA  
SLKSLFGNDPSSQ

Mosaic 2 Gag

MGARASILRGGKLDKWEKIRLRPGGKKHYMLKHLVWASRELERFALNPGLLET  
SEGCKQIIKQLQPALQTGTEELRSLFNTVATLYCVHAEIEVRDTKEALDKIEEEQN  
KSQKQTQQAKEADGKVSQNYPIVQNLQGGQMVHQAI SPRTLNAWVKVIEEKAFSP  
EVIPMFTALSEGATPQDLNMLNTVGGHQAAMQMLKDTINEEAAEWDRLHPVH  
AGPVAPGQMREPRGSDIAGTTSNLQEQIAWMTSNPPPIPVGDIYKRWIILGLNKIVR  
MYSPTSILDIKQGPKEPFRDYVDRFFKTLRAEQATQDVKNWMTDTLLVQNaNPD  
CKTILRALGPGATLEEMMTACQGVGGPSHKARVLAEAMSQTNSTILMQRSNFK  
GSKRIVKCFNCGKEGHIARNCRAPRKKGCWKCCKEGHQMKDCTERQANFLGKI  
WPSHKGRPGNFLQSRPEPTAPPAESFRFEETTPAPKQEPKDREPLTSLRSLFGSDPL  
SQ

M Consensus Gag

MGARASVLSGGKLDWEKIRLRPGGKKKYRLKHLVWASRELERFALNPGLLET  
SEGCKQIIGQLQPALQTGSEELRSLYNTVATLYCVHQRIEVKDTKEALEKIEEEQN  
KSQKQTQQAADKGNSSKVSQNYPIVQNLQGGQMVHQAI SPRTLNAWVKVIEEK  
AFSPEVPMFSALSEGATPQDLNMLNTVGGHQAAMQMLKDTINEEAAEWDRL  
HPVHAGPIPPGQMREPRGSDIAGTTSTLQEQIAWMTSNPPPIPVGEIYKRWIILGLN  
KIVRMYSVPSILDIRQGPKEPFRDYVDRFFKTLRAEQATQDVKNWMTDTLLVQN



ANPDCKTILKALGPGATLEEMMTACQGVGGPGHKARVLAEAMSQVTNAAIMM  
QRGNFKGQRRRIKCFNCGKEGHIARNCRAPRKKGCWKCCKEGHQMKDCTERQA  
NFLGKIWPSNKGPRGNFLQSRPEPTAPPAESFGFGEEITPSPKQEPKDKPEPLTSLK  
SLFGNDPLSQ

Clade C Gag

MGARASILRGGKLDKWEKIRLRPGGKHHYMLKHLVWASRELERFALNPGLLET  
SEGCKQILKQLQPALQTGTEELRSLYNTVATLYCVHAGIEVRDTKEALDKIEEEQ  
NKGQKKTQQAAGADGKVSQNYPIVQNLQGMVHQAIASPRTLNAWVKVIEEKAF  
SPEVPMFTALSEGATPQDLNMLNTVGGHQAAMQMLKDTINEEAAEWDRHP  
VHAGPIAPGQMREPRGSDIAGTTSTLQEQIAWMTNNPPVPVGDYKRWIILGLNKI  
VRMYSVPSILDIKQGPKEPFRDYVDRFFKTLRAEQATQDVKNWMTDTLLVQNA  
NPDCKTILRALGPGATLEEMMTACQGVGGPSHKARVLAEAMSQTGSTIMMQRS  
NFKGSKRIVKCFNCGKEGHIARNCRAPRKKGCWKCCKEGHQMKDCTERQANFL  
GKIWPSHKGRGNFLQSRPEPTAPPAESFRFEETTPAPKQELKDREPLTSLKSLFGS  
DPLSQ

Mosaic 1 Pol

MAPISPIETVPVCLKPGMDGPRVKQWPLTEEKIKALTAICEEMEKEGKITKIGPEN  
PYNTPVFAIKKKDSTKWRKLVDFRELNKRTQDFWEVQLGIPHPAGLKKKKSSTV  
LAVGDAYFSVPLDEGFRKYTAFTIPSTNNETPGIRYQYNVLPQGWKGSFAIFQCS  
MTRILEPFRANKPEIVYQYMAALYVGSLEIGQHRAKIEELREHLLKWFSTTPD  
KKHQKEPPFLWGMGYELHPDKWTVQPIQLPEKDSWTVNDIQKLVGKLNWASQIY  
PGIKVRQLCKLLRGAKALTDIVPLTEEALELAENREILKEPVHGVYDPSKDLIA  
EIQKQGHQWQTYQIYQEPFKNLKTGKYAKMRTAHTNDVKQLTEAVQKIAMESI  
VIWGKTPKFRLLPIQKETWETWWTDYWQATWIPEWEFVNTPLVCLKWYQLEKDP  
IAGVETFYVAGAANRETKLGKAGYVTDGRGRQKIVSLTETTNTQKTALQAIYLALQ  
DSGSEVNIVTASQYALGIIQAQPKSESELVNQIIEQLIKKERVYLSWVPAHKGIG  
GNEQVDKLVSSGIRKVLFLDGIDKAQEEHEKYHSNWRAMASDFNLPPVVAKEIV  
ASCDQCQLKGEAMHGQVDCSPGIWQLACTHLEGKIILVAVHVASGYIEAEVIPAE  
TGQETAYFILKLAGRWPVKVIHTANGSNFTSAAVKAACWWAGIQQEFGIPYNPQ  
SQGVVASMNELKKIIGQVRDQAEHLKTAVQMAVFIHNFKRKGGIGGYSAGERI  
IDIIATDIQTKELQKQIIKIQNFRVYYRDSRDPWKGPAKLLWKGEAVVIQDNSDI  
KVVPRRKVKIHKDYGKQ MAGADCVAGRQDED

Mosaic 2 Pol

MAPISPIETVPVCLKPGMDGPKVKQWPLTEEKIKALVEICTEMEKEGKISKIGPEN  
PYNTPIFAIAIKKKDSTKWRKLVDFRELNKRTQDFWEVQLGIPHPAGLKKKKSSTV  
LAVGDAYFSVPLDEDFRKYTAFTIPSINNETPGIRYQYNVLPQGWKGSFAIFQSSM  
TKILEPFRKQNPDIYQYMAALYVGSLEIGQHRTKIEELRQHLLRWGFTTPDK  
KHQKEPPFLWGMGYELHPDKWTVQPIVLPEKDSWTVNDIQKLVGKLNWASQIYA  
GIKVKQLCKLLRGTKALTEVVPLTEEALELAENREILKEPVHGVYDPSKDLIA  
EIQKQGGQWQTYQIYQEPFKNLKTGKYARMRGAHTNDVKQLTEAVQKIATESIV  
IWGKTPKFKLPIQKETWEAWWTEYWQATWIPEWEFVNTPLVCLKWYQLEKEPI  
VGAETFYVAGAANRETKLGKAGYVTDGRGRQKVVSLTDTTNTQKTALQAIHLALQ  
DSGLEVNIVTASQYALGIIQAQPKSESELVSQIIEQLIKKEKVYLAWVPAHKGIG

GNEQVDKLVSRGIRKVLFLDGIDKAQEEHEKYHSNWRAMASEFNLPPIVAKEIV  
ASCDKCQLKGEAIHGQVDCSPGIWQLACTHLEGKVILVAVHVASGYIEAEVIPAE  
TGQETAYFLLKLAGRWPVKTIHTANGSNFTSATVKAACWWAGIKQEFGIPYNPQ  
SQGVVASINKELKKIIGQVRDQAEHLKTA VQMAVFIHNFKRKGGIGEYSAGERIV  
DIIASDIQTKELQKQITKIQNFRVYYRDSRDPLWKGPALLWKGEGAVVIQDNSD  
IKVVPRRKAKIIRDYGKQ MAGDDCVASRQDED

M Consensus Pol

MAPISPIETVPVCLKPGMDGPKVKQWPLTEEKIKALTEICTEMEKEGKISKIGPEN  
PYNTPIFAIKKKDSTKWRKLVDFRELNKRTQDFWEVQLGIPHPAGLKKKKSXTV  
LDVGDAYFSVPLDEDFRKYTAFTIPSINNETPGIRYQYNVLPQGWKGSIPAIFQSSM  
TKILEPFRTQNPEIVYQYMDHLYVGS DLEIGQHRAKIEELREHLLRWGFTTPDKK  
HQKEPPFLWMGYELHPDKWTVQPIQLPEKDSWTVNDIQKLVGKLNWASQIYPGI  
KVKQLCKLLRGAKALTDIVPLTEEALELAENREILKEPVHGVYYDPSKDLIAEQ  
KQGQDQWYQIYQEPFKNLKTGKYAKMRS AHTNDVKQLTEAVQKIATESIWIW  
GKTPKFRLLPIQKETWETWWTEYWQATWIPEWFEVNTPLVCLKWYQLEKEPIAG  
AETFYVDGAANRETKLGKAGYVTDGRGRQKVSLTETTNTQKTELQAIHLALQDS  
GSEVNIVTDSQYALGIIQAQPKSESELVNQIIEQLIKKEKVYLSWVPAHKGIGGN  
EQVDKLVSTGIRKVLFLDGIDKAQEEHEKYHSNWRAMASDFNLPPIVAKEIVASC  
DKCQLKGEAMHGQVDCSPGIWQLACTHLEGKIILVAVHVASGYIEAEVIPAETG  
QETAYFILKLAGRWPVKVIHTDNGSNFTSAAVKAACWWAGIQQEFGIPYNPQSQ  
GVVESMNKELKKIIGQVRDQAEHLKTA VQMAVFIHNFKRKGGIGGYSAGERIIDII  
IATDIQTKELQKQITKIQNFRVYYRDSRDPIWKGPALLWKGEGAVVIQDNSDIK  
VVPRRKAKIIRDYGKQ MAGDDCVAGRQDED

Clade C Pol

MAPISPIETVPVCLKPGMDGPKIKQWPLTEEKIKALMAICEEMEKEGKITKIGPEN  
PYNTPIFAIKKKDSTKWRKLVDFRELNKRTQDFWEVQLGIPHPAGLKKKKSXTV  
LAVGDAYFSVPLDESFRKYTAFTIPSINNETPGIRYQYNVLPQGWKGSIPAIFQSSM  
TKILEPFRAKNPEIVYQYMAALYVGS DLEIGQHRAKIEELREHLLRWGFTTPDKK  
HQKEPPFLWMGYELHPDKWTVQPIQLPEKDSWTVNDIQKLVGKLNWASQIYSGI  
KVRQLCKLLRGAKALTDIVPLTEEALELAENREILKEPVHGVYYDPSKDLIAEQ  
KQGYDQWYQIYQEPFKNLKTGKYAKMRTAHTNDVKQLTEAVQKIALESIWIW  
GKTPKFRLLPIQKETWEIWWTDYWQATWIPEWFEVNTPLVCLKWYQLEKEPIAGA  
ETFYVAGAANRETKIGKAGYVTDKGRQKIVTLTETTNTQKTALQAIQLALQDSGS  
EVNIVTASQYALGIIQAQPKSESELVNQIIEQLINKERVYLSWVPAHKGIGGNEQ  
VDKLVSSGIRKVLFLDGIDKAQEEHEKYHSNWRAMASEFNLPPVVAKEIVASC  
KCQLKGEAIHGQVDCSPGIWQLACTHLEGKVILVAVHVASGYMEAEVIPAETGQ  
ETAYYILKLAGRWPVKVIHTANGSNFTSAAVKAACWWAGIQQEFGIPYNPQSQG  
VVASMNKELKKIIGQVRDQAEHLKTA VQMAVFIHNFKRKGGIGGYSAGERIIDII  
ATDIQTKELQKQIIKIQNFRVYYRDSRDPIWKGPALLWKGEGAVVIQDNSDIKV  
VPRRKVKIIRDYGKQ MAGADCVAGRQDED
